# Supplementary material for: Nucleolar- and Nuclear-Stress-Induced Membrane-Less Organelles: A Proteome Analysis through the Prism of Liquid–Liquid Phase Separation
Source: MDPI journal article supplement (doi:10.3390/ijms241311007), 2023-07-02
Supplement: s1 [file s1]

# Supplementary Materials

## Nucleolar and nuclear stress-induced membrane-less organelles: A proteome analysis through the prism of liquid-liquid phase separation

**Yakov I. Mokin**<sup>1</sup>, **Anastasia A. Gavrilova**<sup>1</sup>, **Anna S. Fefilova**<sup>1,†</sup>, **Irina M. Kuznetsova**<sup>1</sup>, **Konstantin K. Turoverov**<sup>1</sup>, **Vladimir N. Uversky**<sup>2,\*</sup> and **Alexander V. Fonin**<sup>1,\*</sup>

<sup>1</sup> Laboratory of structural dynamics, stability and folding of proteins, Institute of Cytology, Russian Academy of Sciences, St. Petersburg 194064, Russia; mokinyakov@mail.ru (Y.I.M.); asultanbekova@incras.ru (A.A.G.); anny.fefilova@gmail.com (A.S.F.); imk@incras.ru (I.M.K.); kkt@incras.ru (K.K.T.); alexfonin@incras.ru (A.V.F.)

<sup>2</sup> Department of Molecular Medicine and USF Health Byrd Alzheimer's Research Institute, Morsani College of Medicine, University of South Florida, Tampa, FL 33612, USA; vuversky@usf.edu

† Current address: Center of Genomic Regulation (GRC), Barcelona Institute of Science and Technology, Barcelona, 08003, Spain.

\* Correspondence: alexfonin@incras.ru (A.V.F.) and vuversky@usf.edu (V.N.U.)

Supplementary **Figures S1-S10** represent amino acid sequences and functional disorder profiles of 10 human proteins shared by the acidosis-induced A-bodies, heat-induced A-bodies, and nSBs. In each figure, the upper plot represents amino acid sequence in FASTA format, whereas the bottom plot shows corresponding functional profile generated by the D<sup>2</sup>P<sup>2</sup> platform. In these profiles, the IDPR localization predicted by IUPred, PONDR<sup>®</sup> VLXT, PONDR<sup>®</sup> VSL2, PrDOS, PV2, and ESpritz are shown by 9 differently colored bars on the top of the plot, whereas the blue-green-white bar in the middle of the plots shows the agreement between the outputs of these disorder predictors, with disordered regions by consensus being shown by blue and green. The two lines with colored and numbered bars above the disorder consensus bar show the positions of functional SCOP domains [40, 41] predicted using the SUPERFAMILY predictor [42]. Positions of the predicted disorder-based binding sites (molecular recognition feature (MoRFs) identified by the ANCHOR algorithm are shown by yellow zigzagged bars [43]. Locations of the sites of different posttranslational modifications (PTMs) identified by the PhosphoSitePlus platform [44] are shown at the bottom of the plots by the differently colored circles.

**Figure S1.** Amino acid sequence and functional disorder profile of Nucleolin (NCL; also known as Protein C23; UniProt ID: P19338).

```
>sp|P19338|NUCL_HUMAN Nucleolin OS=Homo sapiens OX=9606 GN=NCL PE=1 SV=3
MVKLAKAGKNQGDPKKMAPPPKEVEEDSEDEEMSEDEEDDSSGEEVVIQKKKGKAAATSACKVVVSPTKKVAVATP
AKKAAVTPGKKAAATPAKKTVTTPAKAVTTPGKKGATPGKALVATPGKKGAAPAKGAKNGKNAKKEDSDEEEDDDSE
EDEEDDEDEDEDEDEIEPAAMKAAAAAPASEDEDEDEDEDEDEDEDEDEDEDEDEDEDEDEDEDEDEDEDEDEDEDE
VAEDEDEDEDEDEDEDEDEDEDEDEDEDEDEDEDEDEDEDEDEDEDEDEDEDEDEDEDEDEDEDEDEDEDEDEDEDE
LFVGNLNFNKSAPELKTGISDVFAKNDLAVVDVIRIGMTRKFGYVDFESAEDLEKALELTGLKVFGNEIKLEKPKGKD
SKKERDARTLLAKNLPYKVTQDELKEVFEDAAEIRLVSKDGKSGIAYIEFKTEADAETFEKQGTETIDGRSISLY
YTGEKGQNQDYRGGKNSTWSGESKTLVLSNLSYSATEETLQEVFEKATFIKVPQNQNGKSKGYAFIEFASFEDAKEA
LNSCNKREIEGRAIRLELQGPRGSPNARSQPSKTLFVKGLSEDTEETLKESEFDGVRARIVTDRETGSSKGFVFVD
FNSEEDAKAAKEAMEDGEIDGNKVTLDWAKPKGEGGFGRGGGRGGFGGRGGGRGGFGGRGGGRGGFGGRGGGFGRGG
RGGGGDHKPQGKKTKE
```

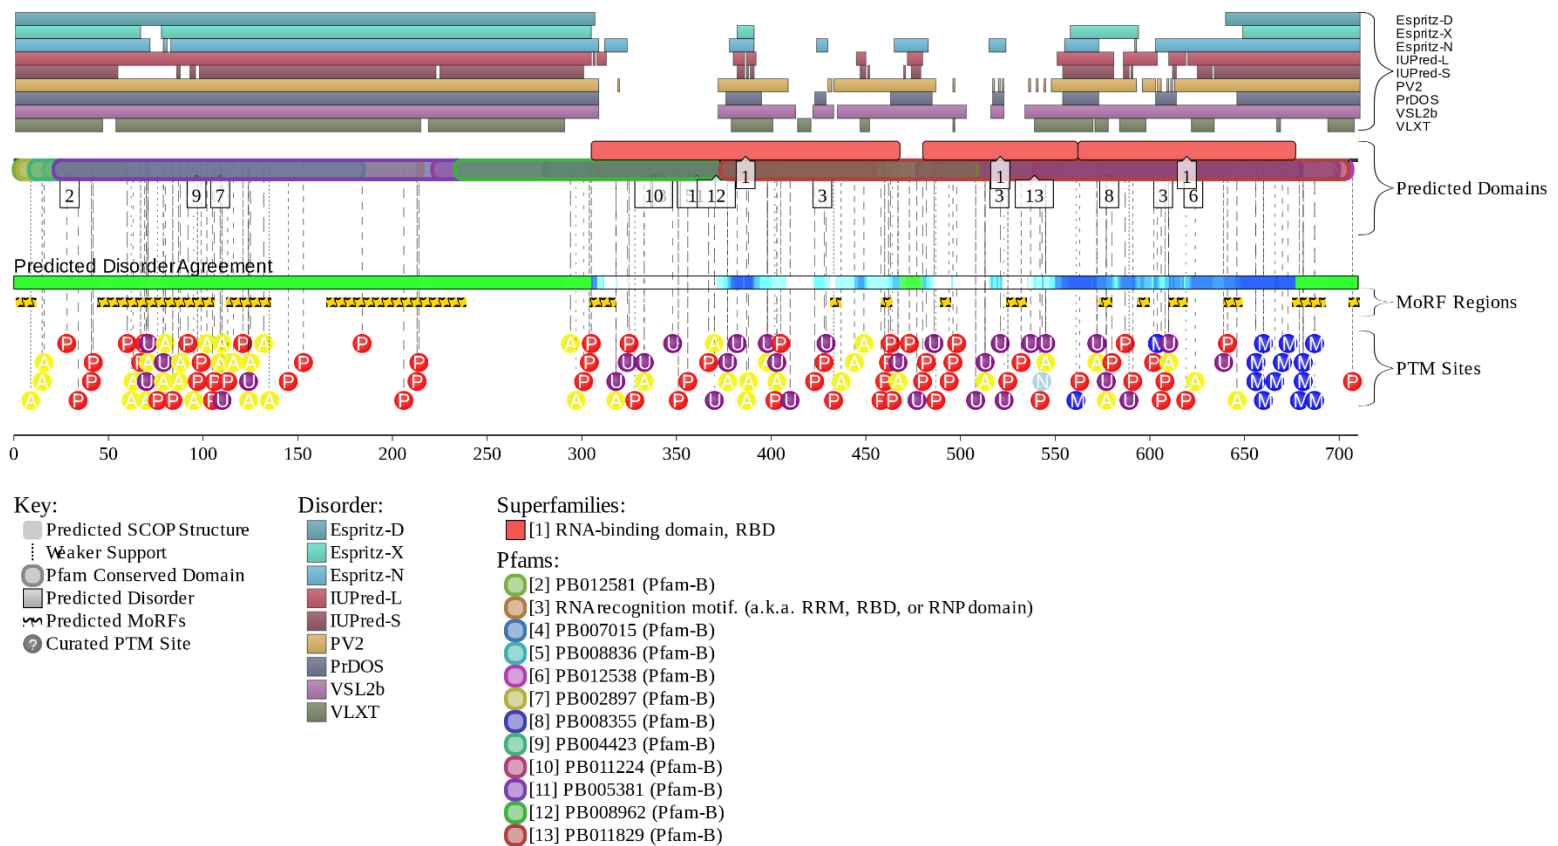

**Figure S2.** Amino acid sequence and functional disorder profile of heterogeneous nuclear ribonucleoprotein M (HNRNPM; UniProt ID: P52272).

```
>sp|P52272|HNRNPM_HUMAN Heterogeneous nuclear ribonucleoprotein M OS=Homo
sapiens OX=9606 GN=HNRNPM PE=1 SV=3
MAAGVEAAAEVAATEIKMEEESGAPGVPSGNGAPGPKGEGERPAQNEKRKEKNIKRGGNRFEPYANPTKRYRAFITN
IPFDVKWQSLKDLVKEKVGEVTVYVELLMDAEGKSRGCAVVEFKMEESMKKAAEVLNKHSLSGRPLKVKEDPDGEHAR
RAMQKVMATTGGMGMPGGPGMITIPPSILNNPNIPNEIIHALQAGRLGSTVFVANLDYKVGWKKLKEVFSMAGVVV
RADILEDKDGKSRGIGTVTFEQSIEAVQAISMFGQLLFDRPMHVKMDERALPKGDFFPFPERPQQLPHGLGGIGMGL
GPGGQPIDANHLNKGIGMGNIGPAGMGMEGIGFGINKMGMEGPFGGGGMENMGRFGSGMNMGRINEILSNALKRGEI
IAKQGGGGGGGSGVPGIERMGPGIDRLGGAGMERMGAGLGHGMDRVGSEIERMGLVMDRMGSVERMGSGIERMGPLGL
DHMASSIERMGQTMERIGSGVERMGAGMGFGLERMAAPIDRVGQTIERMGSGVERMGPAIERMGLSMERMVPAAGMA
GLERMGPVMDRMATGLERMGANNLERMGLERMGANSLERMGLERMGANSLERMGPAMGPALGAGIERMGLAMGGGGG
ASFDRAIEMERGNFGGSFAGSFAGGAGGHAPGVARKACQIFVRNLPFDFTWKMLKDKFNECGHVLYADIKMENGKSKG
CGVVKFESPEVAERACRMNMGKLSGREIDVRIDRNA
```

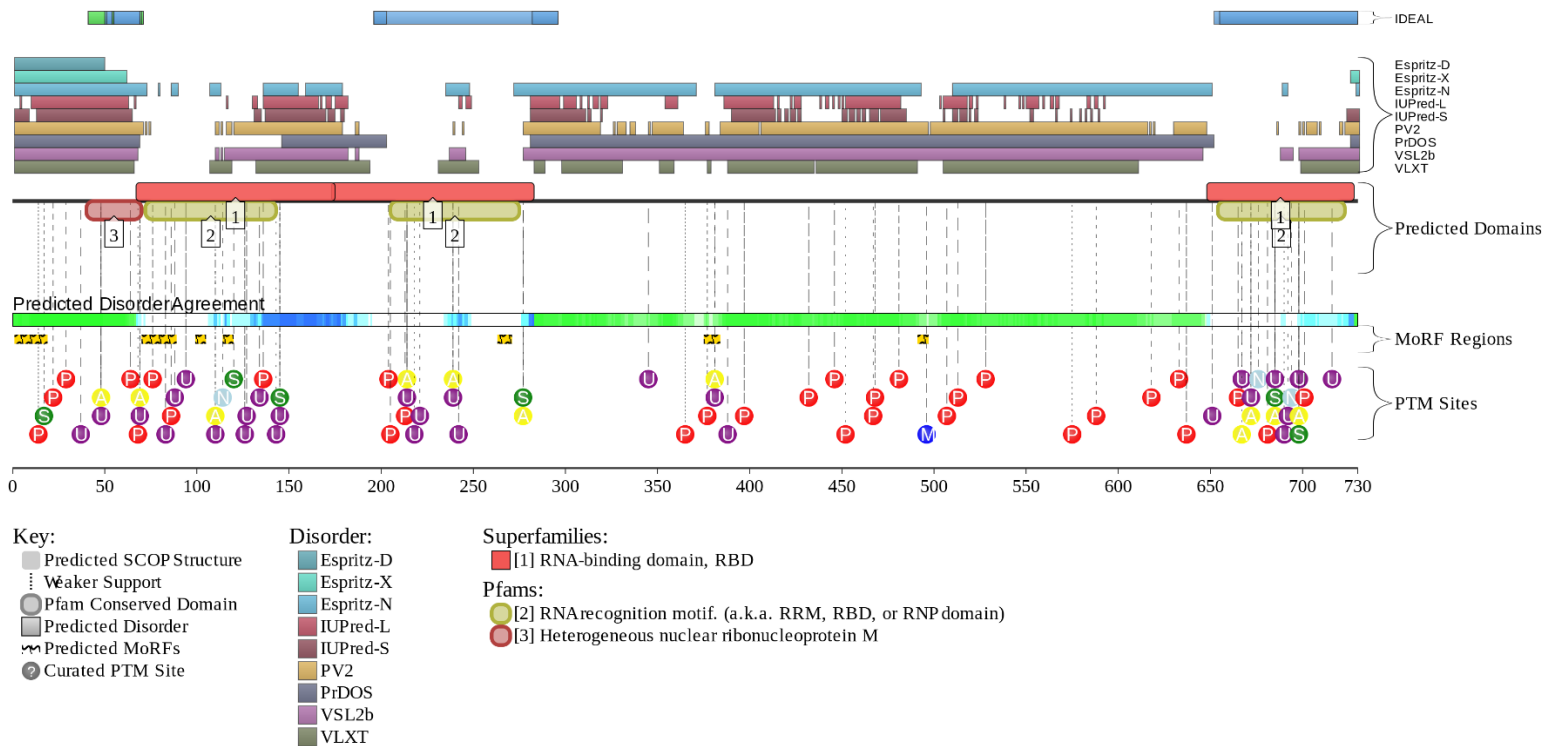

**Figure S3.** Amino acid sequence and functional disorder profile of putative RNA-binding protein Luc7-like 2 (LUC7L2, also known as CGI-74; UniProt ID: Q9Y383).

```
>sp|Q9Y383|LC7L2_HUMAN Putative RNA-binding protein Luc7-like 2 OS=Homo
sapiens OX=9606 GN=LUC7L2 PE=1 SV=2
MSAAQAMRAMLDQLMGTSRDGDTTRQRIKFSDDRVCCKSHLLNCCPHDVLSGTRMDLGECLKVHDLALRADYEIASKE
QDFFFEELDAMDHLQSFADCDRRTTEVAKKRLAETQEEISAEVAAKAERVHELNEEIGKLLAKVEQLGAEGNVEESQK
VMDEVEKARAKKREAEVYRNSMPASSFQQQKLRVCEVC SAYLGLHDNDRRLADHFGGKLHLGFIEIREKLEELKRV
VAEKQEKNQERLKRREEREREEREKLRSSRSRSHSKNPKRSRSREHRRHRSRSMRSRERKRRTSRKSRREKRRHRSRSS
SRSSRSRSHQSRSHSSRDRSRERSKRSSKERFRDQDLASCDRDRSSRDRSPDRDRKDKKRSYESANGRSEDRRSSE
EREAGEI
```

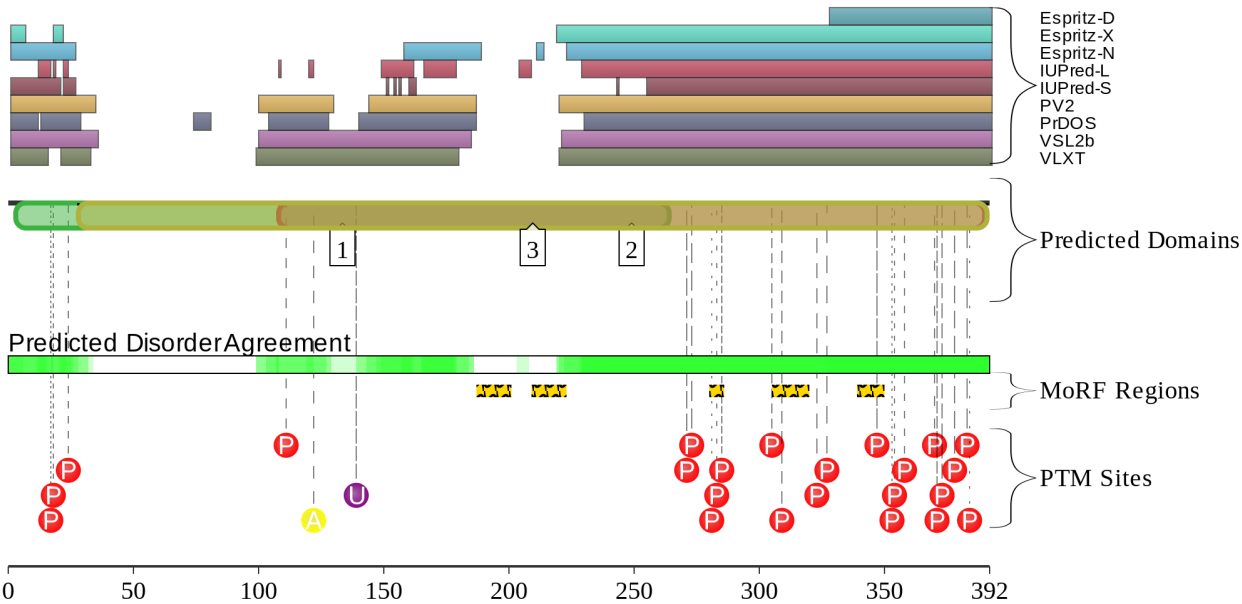

Key:

- Predicted SCOP Structure
- Weaker Support
- Pfam Conserved Domain
- Predicted Disorder
- Predicted MoRFs
- Curated PTM Site

Disorder:

- Espritz-D
- Espritz-X
- Espritz-N
- IUPred-L
- IUPred-S
- PV2
- PrDOS
- VSL2b
- VLXT

Superfamilies:

N/A No Hits

Pfams:

- [1] PF03194.10 (Family)
- [2] PB001507 (Pfam-B)
- [3] PB006997 (Pfam-B)

**Figure S4.** Amino acid sequence and functional disorder profile of heterogeneous nuclear ribonucleoprotein A0 (HNRNPA0; UniProt ID: Q13151).

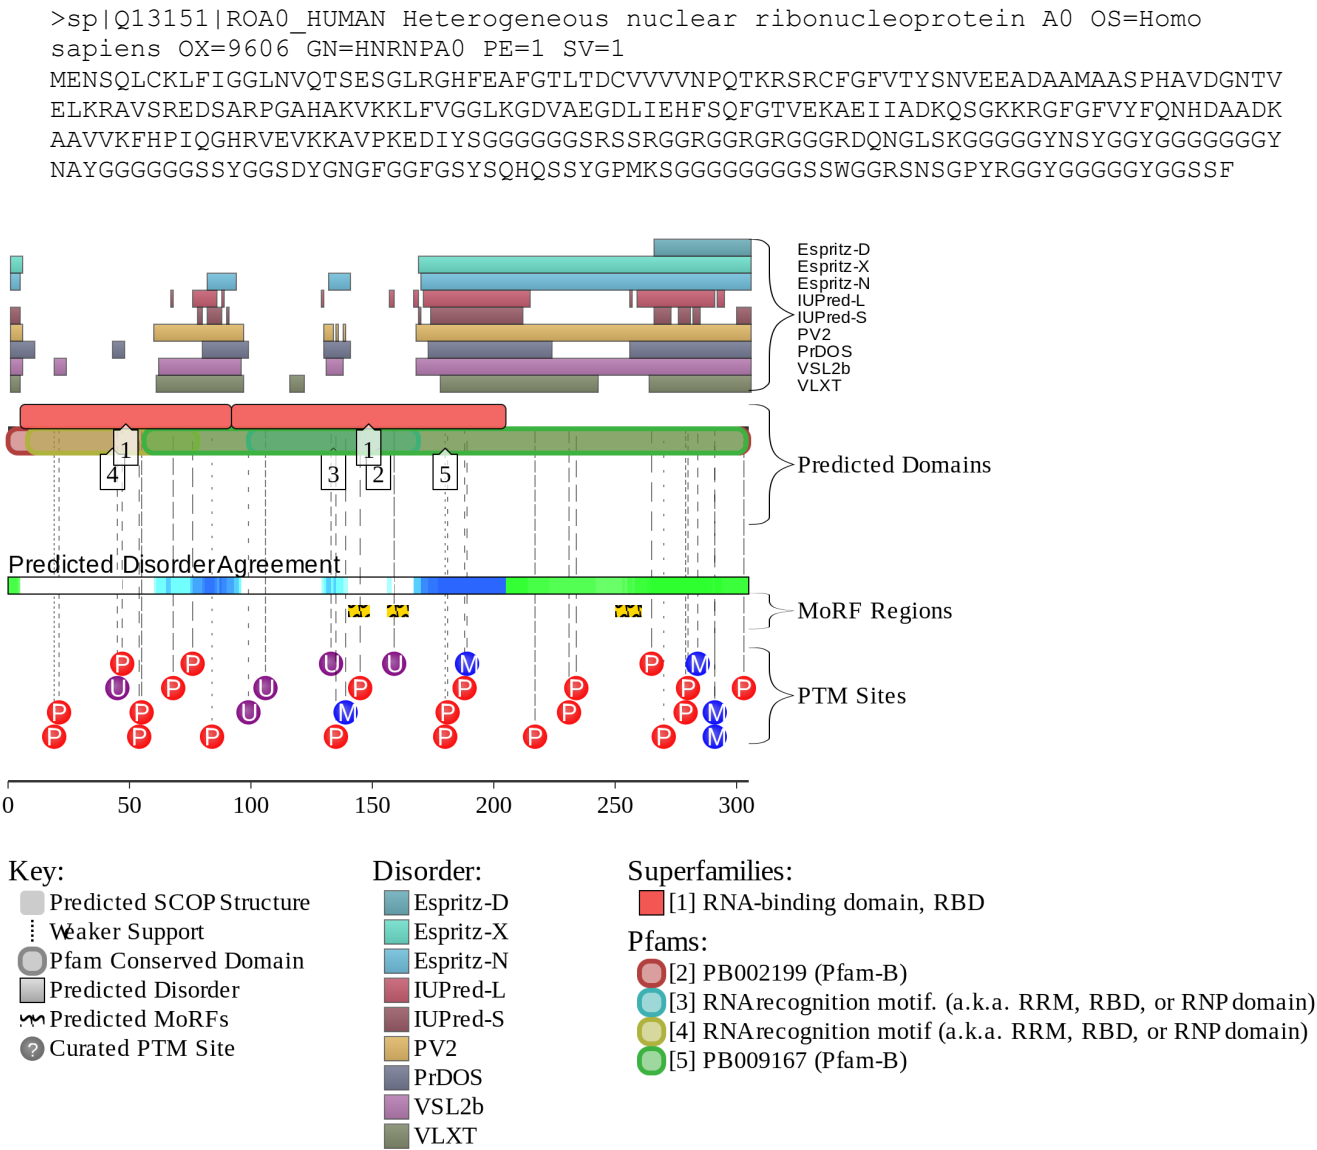

**Figure S5.** Amino acid sequence and functional disorder profile of heterogeneous nuclear ribonucleoprotein K (HNRNPK; UniProt ID: P61978).

```
>sp|P61978|HNRPK_HUMAN Heterogeneous nuclear ribonucleoprotein K OS=Homo
sapiens OX=9606 GN=HNRNPK PE=1 SV=1
METEQPEETFPNTETNGEFGKRPADMEEEQAFKRSRNTDEMVELRILLQSKNAGAVIGGGKNIKALRTDYNASVS
VPDSSGPERILSISADIETIGEILKKIIP TLEEGQLPSPTATSQLPLESDAVECLNYQHYKGSDFDCELRLLIHQ
LAGGIIGVKGAKIKELRENTQT TIKLFQECCPHSTDRVVLIGGKPDRVVECIKIILDLISESPIKGRAQPYDPNFYD
ETYDYGGFTMMFDDRRGRPVGFPMRGRGGFDRMPGGRGGRPMPPSRDYDDMSPRRGPPPPPPGRGGRGGSARNL
LPPPPPPRGGDL MAYDRRGRPGDRYDGMVGFSADETWD SAIDTWSPSEWQ MAYEPQGGSGYDYSYAGGRGSYGD
LGGPIITTQVTIPKDLAGSIIGKGGQRIKQIRHESGASIKIDEPLEGSEDRIITITGTQDQIQNAQYLLQNSVKQ
YSKGF
```

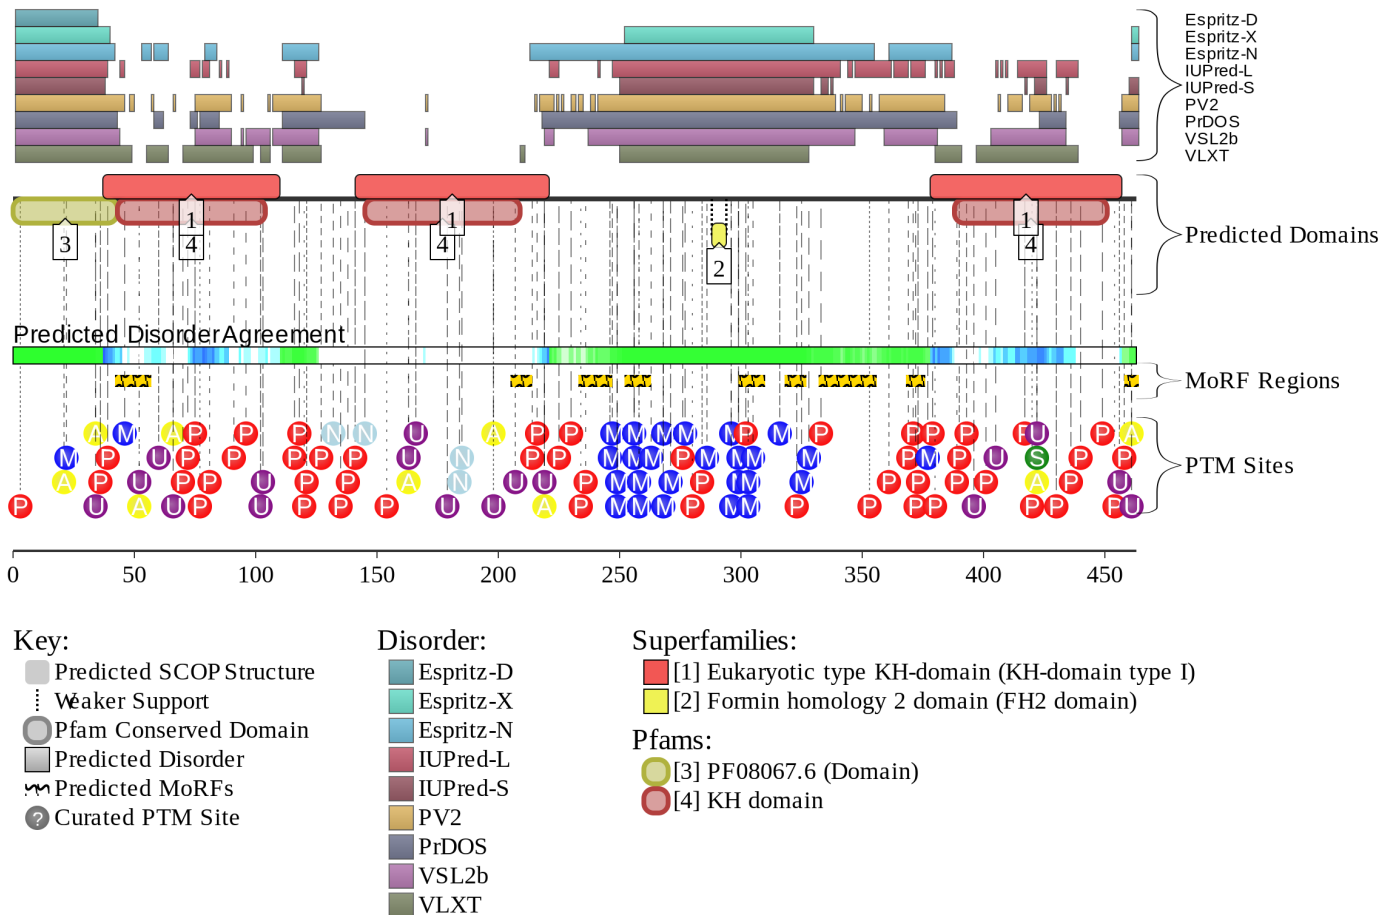

**Figure S6.** Amino acid sequence and functional disorder profile of RNA-binding protein 39 (RBM39; also known as CAPER alpha; Hepatocellular carcinoma protein 1; RNA-binding motif protein 39; RNA-binding region-containing protein 2; and Splicing factor HCC1UniProt ID: Q14498).

>sp|Q14498|RBM39\_HUMAN RNA-binding protein 39 OS=Homo sapiens OX=9606  
GN=RBM39 PE=1 SV=2

MADDIDIEAMLEAPYKKDENKLSSANGHEERSKKRKKSKSRSRSHERKRSKSKERKRSRDRERKKSKSRERKRSRSK  
ERRRSRSRSDRRFRGRYRSPYSGPKFNSAIRGKIGLPHSIKLSRRRSRSKSPFRKDKSPVREPIDNLTPEERDART  
VFCMQLAARIRPRDLEEFFSTVGKVRDVRMISDRNSRRSKGIAYVEFVDVSSVPLAIGLTGQRVLGVPPIIVQASQAE  
KNRAAMANNLQKGSAGPMRLYVGS LHFNITEDMLRGIFEPFGRIESIQLMMDSETGRSKGYGFITFSDSECAKKAL  
EQLNGFELAGRPMKVGHVTERTDASSASSFLDSDELERTGIDLTGRLQLMARLAEGTGLQIPPAQQALQMSGSL  
AFGAVAEFSFVIDLQTRLSSQQTEASALAAAASVQPLATQCFQLSNMFPQTETEEVGVWDTEIKDDVIEECNKHGGVIH  
IYVDKNSAQGNVYVKCPSIAAAIAAVNALHGRWFAGKMITAAYVPLPTYHNLFPDSMTATQLLVPSRR

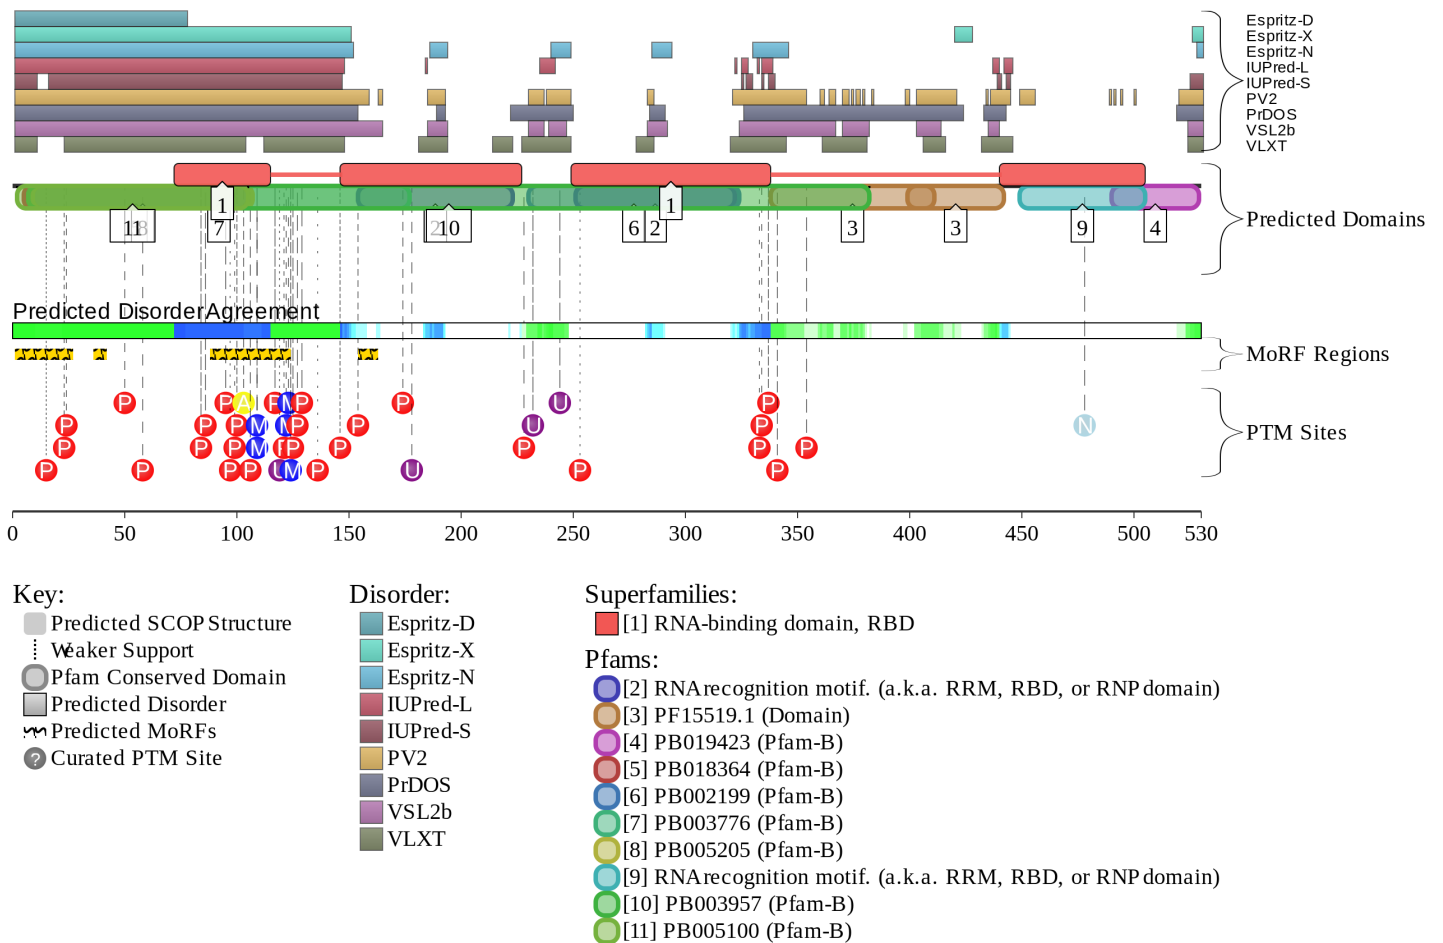

**Figure S7.** Amino acid sequence and functional disorder profile of heterogeneous nuclear ribonucleoprotein H (HNRNPH1; UniProt ID: P31943).

```
>sp|P31943|HNRH1_HUMAN Heterogeneous nuclear ribonucleoprotein H OS=Homo sapiens OX=9606 GN=HNRNPH1 PE=1 SV=4
MMLGTEGGEGFVVKVRGLPWSCSADEVQRFFSDCKIQNGAQGIRFIYTREGRPSCGEAFVELESEDEVKLALKKDRET
MGHRYVEVFKSNNVEMDVLKHTGPNSPDTANDGFVRLRGLPFGCSKEEIVQFFSGLEIVPNGITLPVDFQGRSTGE
AFVQFASQEI AEKALKKKHKEIGHRYIEIFKSSRAEVRTHYDPPRKLMMAMQRPQPYDRPGAGRGYNSIGRGAGFERM
RRGAYGGGYGGYDDYNGYNDGYGFGSDRFGRDLNYCFSGMSDHRYGDDGGSTFQSTTGHCVMRGLPYRATENDIYNF
FSPLNPVRVHIEIGPDGRVTGEADVEFATHEDAVAAMSKDKANMQHRYVELFLNSTAGASGGAYEHRYVELFLNSTA
GASGGAYGSQMMGMGLSNQSSYGGPASQQLSGGYGGGYGGQSSMSGYDQVLQENSSDFQSNIA
```

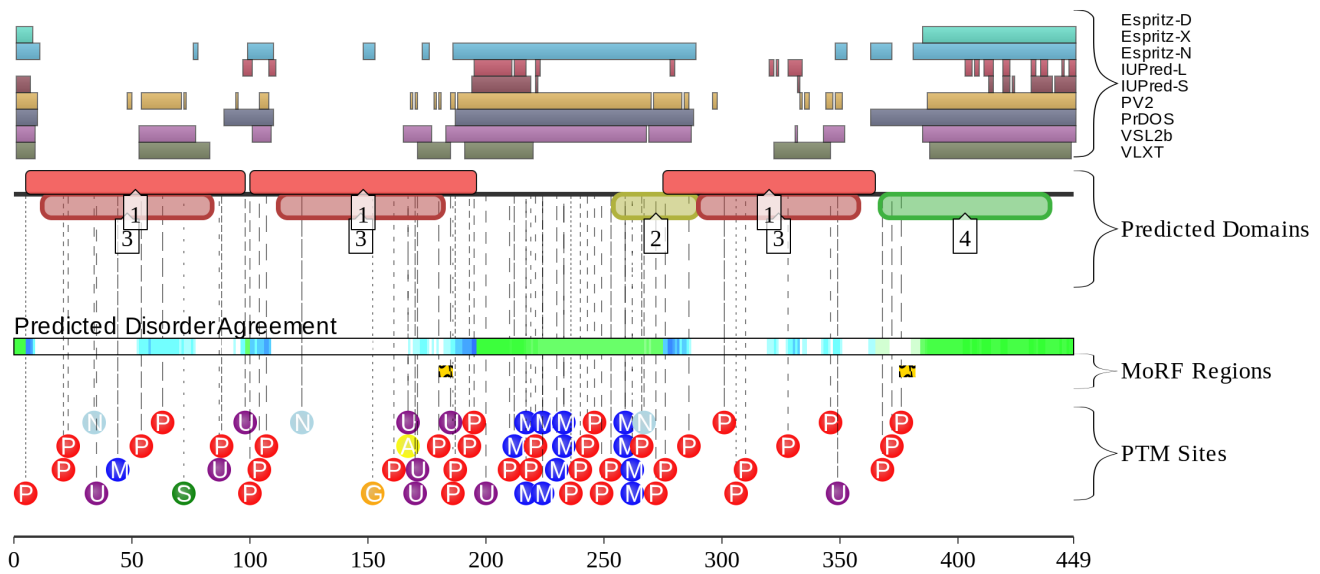

**Key:**

- Predicted SCOP Structure
- ⋯ Weaker Support
- Pfam Conserved Domain
- Predicted Disorder
- ⚡ Predicted MoRFs
- Ⓢ Curated PTM Site

**Disorder:**

- Espritz-D
- Espritz-X
- Espritz-N
- IUPred-L
- IUPred-S
- PV2
- PrDOS
- VSL2b
- VLXT

**Superfamilies:**

- [1] RNA-binding domain, RBD

**Pfams:**

- [2] RNPHF zinc finger
- [3] RNA recognition motif (a.k.a. RRM, RBD, or RNP domain)
- [4] PB007380 (Pfam-B)



**Figure S8.** Amino acid sequence and functional disorder profile of heat shock cognate 71 kDa protein (also known as heat shock 70 kDa protein 8 (HSPA8) and Lipopolysaccharide-associated protein 1 (LAP-1; LPS-associated protein 1); UniProt ID: P11142).

```
>sp|P11142|HSP7C_HUMAN Heat shock cognate 71 kDa protein OS=Homo sapiens
OX=9606 GN=HSPA8 PE=1 SV=1
MSKGPVAGIDLGTTYSCVGVFQHGKVEIIANDQGNRTTPSYVAFTDTERLIGDAAKNQVAMNPTNTVFDKRLIGRR
FDDAVVQSDMKHWPFMVVDAGRPKVQVEYKGETKSFYEEVSSMVLTKMKEIAEAYLGKTVTNVAVVTPAYFNDSSQ
RQATKDAGTIAGLNLVRIINEPTAAAIAYGLDKKVGAEARNVLIIFDLGGGTFDVSILTIEDGIFEVKSTAGDTHLGGE
DFDNRMVNHFIAEFKRKHKKDISENKRAVRLRTACERAKRTLSSTQASIEIDSLYEGIDFYTSITRARFEELNAD
LFRGTLDPVEKALRDAKLKDSQIHDIIVLVGGSTRIPKIQKLLQDFFNGKELNKSINPDEAVAYGAAVQAAILSGDKS
ENVQDLLLLDVTPLSLGIETAGGVMTVLIKRNTTIPTKQTQTFTTYSNQPVGVLIQVYEGERAMTKDNNLLGKFELT
GIPAPRGVPQIEVTFDIDANGILNVSAVDKSTGKENKITITNDKGRLSKEDIERMVQEAKEYKADEKQQRDKVSSK
NSLESYAFNMKATVEDEKLQKINDEDKQKILDKCNEIINWLDKNQTAEKEEFEHQQKELEKVCNPIITKLYQSAGG
MPGGMPGGFPGGGAPPSGGASSGPTIEEV
```

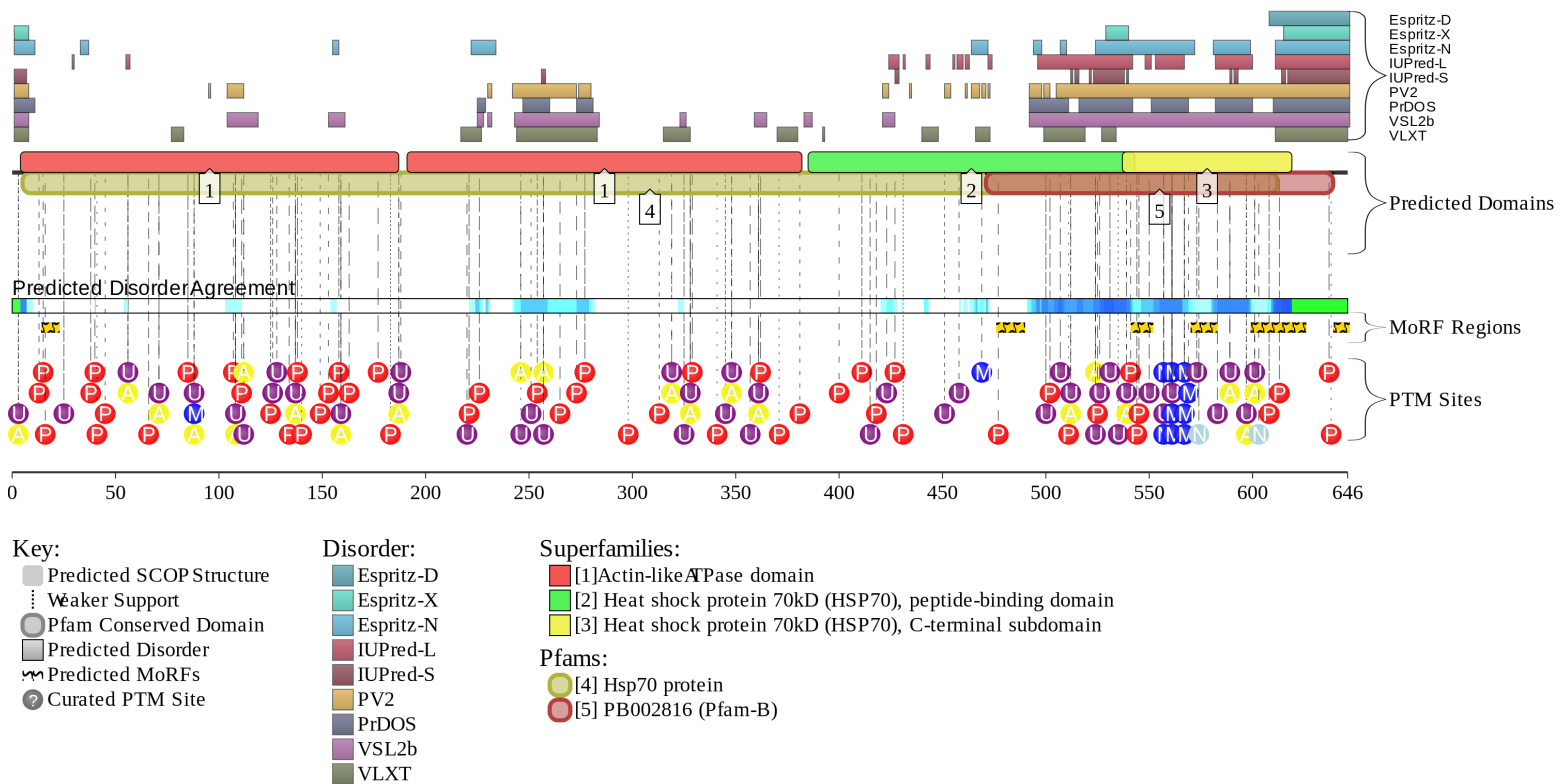

**Figure S9.** Amino acid sequence and functional disorder profile of peptidyl-prolyl cis-trans isomerase A (PPIA, UniProt ID: P62937).

```
>sp|P62937|PPIA_HUMAN Peptidyl-prolyl cis-trans isomerase A OS=Homo sapiens
OX=9606 GN=PPIA PE=1 SV=2
MVNPTVFFDIAVDGEPLGRVSFELFADKVPKTAENFRALSTGEKGFYKGSFCFHRIIPGFMCQGGDFTRHNGTGGKS
IYGEKFEDENFILKHTGPGILSMANAGPNTNGSQFFICTAKTEWLDGKHVVFGVKVEGMNIVEAMERFGSRNGKTSK
KITIADCGQLE
```

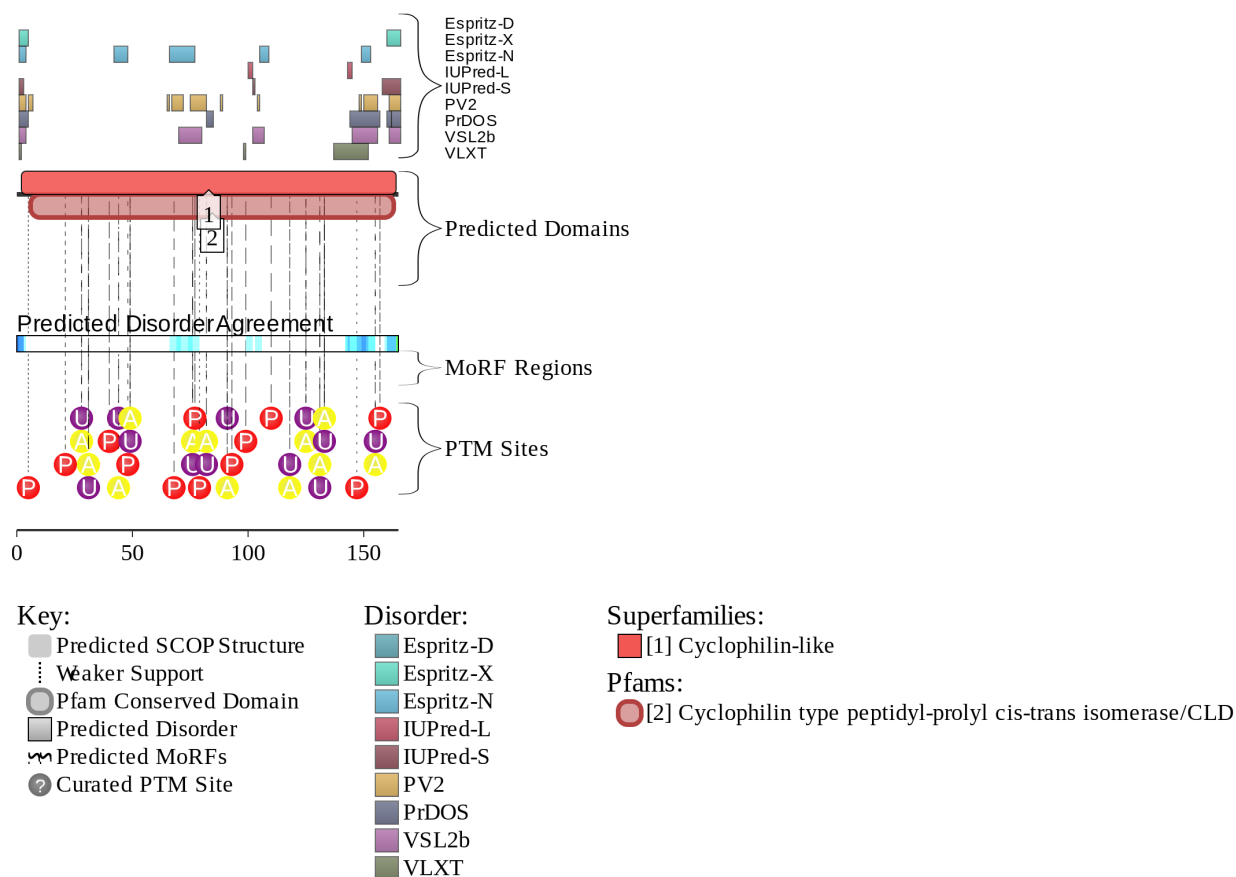

**Figure S10.** Amino acid sequence and functional disorder profile of ATP-dependent RNA helicase DDX39A (also known as DEAD box protein 39 (DDX39A) and Nuclear RNA helicase URH49 (UniProt ID: O00148).

```
>sp|O00148|DX39A_HUMAN ATP-dependent RNA helicase DDX39A OS=Homo sapiens
OX=9606 GN=DDX39A PE=1 SV=2
MAEQDVENDLLDYDEEEEPQAPQESTPAPPKKDIKGSYVSIHSSGFRDFLKPELLRAIVDCGFEHPSEVQHECIPQ
AILGMDVLCQAKSGMGKTAVFVLATLQQIEPVNGQVTVLVMCHTRELAFQISKEYERFSKYMPSVKVSVFFGGLSIK
KDEEVLKKNCPHVVVGTGPRILALVRNRSFSLKNVKHFVLDECDKMLEQLDMRRDVQEIFRLTPHEKQCMMFSAATLS
KDIRPVCRKFMQDPMEVFVDDETCLTLHGLQQYYVKLKDSEKNRKLFDLLDVLEFNQVIIIFVKSQVRCMALAQLLVE
QNFPATIAIHRGMAQEERLSRYQQFKDFQRRILVATNLFGRGMDIERNIVFNYPEDSDTYLHRVARAGRFGTKGL
AITFVSDENDAKILNDVQDRFEVNVAELPEEIDISTYIEQSR
```

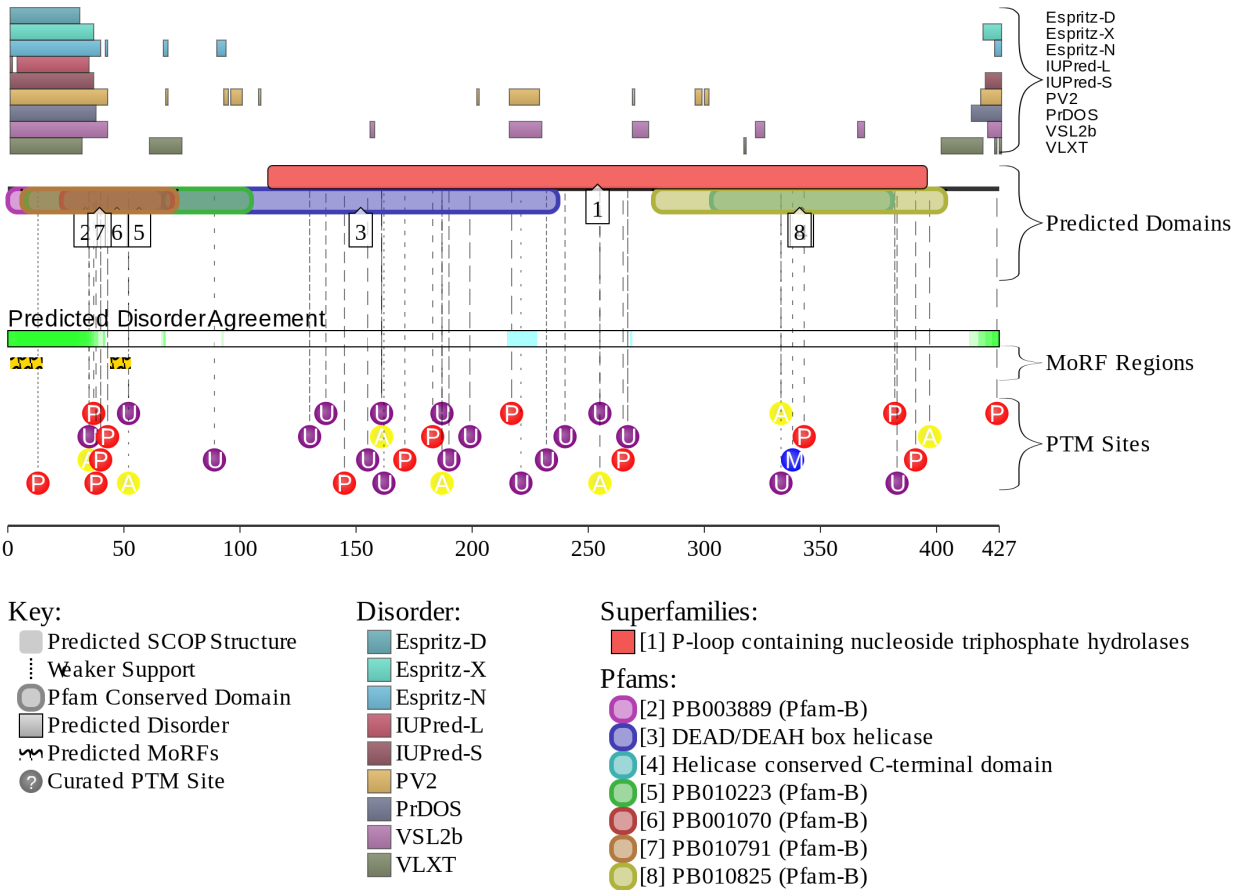

**Table S1.** Characteristics of the proteome of the heat shock-induced A-bodies. DPR are droplet-promoting regions, nHS are number of aggregation hot spots, Na4vSS are Normalized a4v Sequence Sum for 100 residues used for aggregation prediction.

| Gene Name | UniProtID | Fasta               | Sequence | PER(VSL2B) | Disorder Classifications | FuzDrop Score | FuzDrop LLPS | PSPredict or Score | PSPredict or LLPS | Fuz&PSP LLPS | Fuz&PSP No LLPS | Number of DPRs | Role in MLO | nHS | Na4vSS   | Agregation Predicted | Aggregation DB scanning | Hydrophobicity | Charge |
|-----------|-----------|---------------------|----------|------------|--------------------------|---------------|--------------|--------------------|-------------------|--------------|-----------------|----------------|-------------|-----|----------|----------------------|-------------------------|----------------|--------|
| VHL       | P40337    | >sp P40337 PGTGRRH  | 55.87    |            | IDP                      | 0.6579        | Yes          | 0.0102             | No                |              |                 | 2              | Driver      | 6   | -23      | No                   | Yes                     | -0.78          | -0.073 |
| GSTM3     | P21266    | >sp P21266 MSCCESSM | 14.22    |            | Partial IDP              | 0.1175        | No           | 0.0047             | No                | +            |                 | 0              | No          | 9   | -2.8     | No                   | No                      | -0.41          | -0.016 |
| FEN1      | P39748    | >sp P39748 MGIQGLA  | 44.47    |            | IDP                      | 0.2197        | No           | 0.2899             | No                | +            |                 | 2              | Client      | 11  | -14.1    | No                   | No                      | -0.53          | 0.026  |
| MPP10     | O00566    | >sp O00566 MAPQVW   | 76.95    |            | IDP                      | 0.9394        | Yes          | 0.2793             | No                |              |                 | 7              | Driver      | 9   | -36.6    | No                   | No                      | -1.11          | -0.070 |
| PCBP2     | Q15366    | >sp Q15366 MDTGVEIC | 44.93    |            | IDP                      | 0.9028        | Yes          | 0.2466             | No                |              |                 | 3              | Driver      | 10  | -3.4     | No                   | No                      | -0.14          | 0.003  |
| AN32B     | Q92688    | >sp Q92688 MDMKRRI  | 61.75    |            | IDP                      | 0.4995        | No           | 0.5683             | Yes               |              |                 | 1              | Client      | 3   | -47.7    | No                   | No                      | -1.16          | -0.263 |
| MYL6      | P60660    | >sp P60660 MCDFTED  | 19.21    |            | Partial IDP              | 0.1325        | No           | 0.0072             | No                | +            |                 | 0              | No          | 7   | -13.2    | No                   | No                      | -0.39          | -0.079 |
| LC7L2     | Q9Y383    | >sp Q9Y383 MSAQAAQ  | 74.49    |            | IDP                      | 0.9512        | Yes          | 0.0666             | No                |              |                 | 3              | Driver      | 2   | -50.2    | No                   | No                      | -1.49          | 0.088  |
| RRP12     | Q5JTH9    | >sp Q5JTH9 MGRSGKL  | 36.24    |            | IDP                      | 0.5879        | No           | 0.5229             | Yes               |              |                 | 7              | Client      | 44  | -4.9     | No                   | No                      | -0.23          | 0.032  |
| COMT      | P21964    | >sp P21964 MPEAPPL  | 7.01     |            | Ordered                  | 0.1043        | No           | 0.0046             | No                |              | +               | 0              | No          | 9   | 9.1      | Yes                  | No                      | 0.16           | -0.022 |
| POP1      | Q99575    | >sp Q99575 MSNAKER  | 50.88    |            | IDP                      | 0.9448        | Yes          | 0.6756             | Yes               | +            |                 | 8              | Driver      | 37  | -16      | No                   | No                      | -0.62          | 0.056  |
| UT14A     | Q9BVJ6    | >sp Q9BVJ6 MTANRLA  | 81.06    |            | IDP                      | 0.9196        | Yes          | 0.3773             | No                |              |                 | 6              | Driver      | 5   | -29.4    | No                   | No                      | -0.94          | 0.011  |
| HSPB1     | P04792    | >sp P04792 MTERRVP  | 57.56    |            | IDP                      | 0.6398        | Yes          | 0.0151             | No                |              |                 | 2              | Driver      | 3   | -13.1    | No                   | No                      | -0.57          | -0.002 |
| CDC73     | Q6P1J9    | >sp Q6P1J9 MADVLSV  | 53.67    |            | IDP                      | 0.4019        | No           | 0.4929             | No                |              | +               | 4              | Client      | 14  | -12.5    | No                   | No                      | -0.58          | 0.046  |
| SUMO2     | P61956    | >sp P61956 MADEKPK  | 52.63    |            | IDP                      | 0.1814        | No           | 0.4944             | No                |              | +               | 1              | Client      | 2   | -30.2    | No                   | No                      | -0.89          | -0.021 |
| ML12A     | P19105    | >sp P19105 MSKRTKT  | 41.52    |            | IDP                      | 0.6107        | Yes          | 0.0338             | No                |              |                 | 1              | Driver      | 5   | -25      | No                   | No                      | -0.83          | -0.064 |
| XPO2      | P55060    | >sp P55060 MELSDAN  | 12.05    |            | Partial IDP              | 0.1253        | No           | 0.1683             | No                |              | +               | 0              | No          | 39  | 6.8      | Yes                  | No                      | -0.03          | -0.013 |
| NOM1      | Q5C9Z4    | >sp Q5C9Z4 MAASRSA  | 55.47    |            | IDP                      | 0.9475        | Yes          | 0.8288             | Yes               | +            |                 | 5              | Driver      | 19  | -21.1    | No                   | No                      | -0.64          | 0.016  |
| BYST      | Q13895    | >sp Q13895 MPKFKA   | 48.97    |            | IDP                      | 0.2822        | No           | 0.1084             | No                |              | +               | 2              | Client      | 15  | -8.2     | No                   | No                      | -0.37          | 0.015  |
| SSF1      | Q9NQ55    | >sp Q9NQ55 MGQSGRS  | 54.55    |            | IDP                      | 0.7386        | Yes          | 0.0358             | No                |              |                 | 4              | Driver      | 12  | -24.2    | No                   | No                      | -0.76          | 0.079  |
| NUMA1     | Q14980    | >sp Q14980 MTLHATR  | 94.42    |            | IDP                      | 1             | Yes          | 0.6606             | Yes               | +            |                 | 26             | Driver      | 20  | -34.9492 | No                   | No                      | -0.92          | -0.013 |
| HS71B     | P0DMV9    | >sp P0DMV9 MAKAAAI  | 29.64    |            | Partial IDP              | 0.3928        | No           | 0.1251             | No                |              |                 | 2              | Client      | 18  | -12.3    | No                   | No                      | -0.38          | -0.012 |
| PPIA      | P62937    | >sp P62937 MVNPTVF  | 20.61    |            | Partial IDP              | 0.2089        | No           | 0.0057             | No                |              | +               | 0              | No          | 7   | -6.7     | No                   | No                      | -0.32          | 0.018  |
| NOL10     | Q9B5C4    | >sp Q9B5C4 MQVSSLN  | 44.62    |            | IDP                      | 0.2473        | No           | 0.0748             | No                |              | +               | 2              | Client      | 19  | -15.6    | No                   | No                      | -0.75          | 0.022  |
| 1433Z     | P63104    | >sp P63104 MDKNELV  | 53.88    |            | IDP                      | 0.2169        | No           | 0.0048             | No                |              | +               | 1              | Client      | 6   | -18.2    | No                   | No                      | -0.62          | -0.055 |
| AATF      | Q9NY61    | >sp Q9NY61 MAGPQPL  | 65.71    |            | IDP                      | 0.7654        | Yes          | 0.2619             | No                |              |                 | 4              | Driver      | 8   | -31.5    | No                   | No                      | -0.91          | -0.058 |
| RRP1      | P56182    | >sp P56182 MVSRVQL  | 50.76    |            | IDP                      | 0.7152        | Yes          | 0.0183             | No                |              |                 | 2              | Driver      | 10  | -26.9    | No                   | No                      | -0.84          | 0.029  |
| PHF6      | Q8IWS0    | >sp Q8IWS0 MSSSVEQ  | 54.52    |            | IDP                      | 0.8738        | Yes          | 0.9423             | Yes               | +            |                 | 4              | Driver      | 6   | -30.5    | No                   | No                      | -1.01          | 0.067  |
| NOC4L     | Q9BVI4    | >sp Q9BVI4 MEREPGA  | 21.71    |            | Partial IDP              | 0.3262        | No           | 0.0045             | No                |              | +               | 2              | Client      | 21  | 3.7      | Yes                  | No                      | -0.08          | 0.018  |
| ESF1      | Q9H501    | >sp Q9H501 MSSKQEI  | 81.67    |            | IDP                      | 0.9412        | Yes          | 0.43               | No                |              |                 | 10             | Driver      | 11  | -38.5    | No                   | No                      | -1.23          | -0.044 |
| KRR1      | Q13601    | >sp Q13601 MASPSELR | 55.64    |            | IDP                      | 0.6197        | Yes          | 0.2739             | No                |              |                 | 4              | Driver      | 10  | -18.5    | No                   | No                      | -0.78          | 0.084  |
| HS90B     | P08238    | >sp P08238 MPPEVHH  | 45.03    |            | IDP                      | 0.3869        | No           | 0.2768             | No                |              | +               | 3              | Client      | 18  | -17.3    | No                   | No                      | -0.68          | -0.046 |
| HNRPF     | P52597    | >sp P52597 MMLGPEG  | 40.48    |            | IDP                      | 0.5243        | No           | 0.0968             | No                |              | +               | 3              | Client      | 10  | -10.7    | No                   | No                      | -0.47          | -0.020 |
| NOP14     | P78316    | >sp P78316 MAKAKKV  | 70.36    |            | IDP                      | 0.859         | Yes          | 0.8195             | Yes               | +            |                 | 7              | Driver      | 16  | -23.3    | No                   | No                      | -0.76          | 0.013  |
| DX39A     | O00148    | >sp O00148 MAEQDVE  | 18.27    |            | Partial IDP              | 0.1354        | No           | 0.0079             | No                |              | +               | 1              | Client      | 16  | -4       | No                   | No                      | -0.30          | -0.016 |
| HNRH1     | P31943    | >sp P31943 MMLGTEG  | 51.22    |            | IDP                      | 0.9486        | Yes          | 0.9727             | Yes               | +            |                 | 3              | Driver      | 9   | -16      | No                   | No                      | -0.60          | -0.004 |
| U2AF1     | Q01081    | >sp Q01081 MAEYLAS  | 45.83    |            | IDP                      | 0.3606        | No           | 0.542              | Yes               |              |                 | 1              | Client      | 6   | -31.9    | No                   | No                      | -1.06          | 0.048  |
| K0020     | Q15397    | >sp Q15397 MEVKGKK  | 34.41    |            | IDP                      | 0.2025        | No           | 0.3415             | No                |              | +               | 2              | Client      | 23  | -12      | No                   | No                      | -0.56          | 0.076  |
| BCCIP     | Q9P287    | >sp Q9P287 MASRSKR  | 35.99    |            | IDP                      | 0.3828        | No           | 0.6835             | Yes               |              |                 | 1              | Client      | 8   | -20.5    | No                   | No                      | -0.69          | -0.083 |
| SERA      | Q43175    | >sp Q43175 MAFANLR  | 8.26     |            | Ordered                  | 0.1623        | No           | 0.0149             | No                |              | +               | 1              | Client      | 21  | 1.2      | Yes                  | No                      | 0.09           | 0.002  |
| IF5A2     | Q9GZV4    | >sp Q9GZV4 MADEIDF  | 35.95    |            | IDP                      | 0.2524        | No           | 0.0061             | No                |              | +               | 1              | Client      | 6   | -9.4     | No                   | No                      | -0.35          | -0.020 |
| ROA0      | Q13151    | >sp Q13151 MENSQLC  | 61.97    |            | IDP                      | 0.9818        | Yes          | 0.9959             | Yes               | +            |                 | 1              | Driver      | 5   | -20.5    | No                   | No                      | -0.59          | 0.043  |
| DDX49     | Q9Y6V7    | >sp Q9Y6V7 MAGFAEL  | 21.95    |            | Partial IDP              | 0.1582        | No           | 0.0188             | No                |              | +               | 1              | Client      | 19  | -2.2     | No                   | No                      | -0.18          | 0.041  |
| TIF1B     | Q13263    | >sp Q13263 MAASAAA  | 63.11    |            | IDP                      | 0.9946        | Yes          | 0.9829             | Yes               | +            |                 | 6              | Driver      | 18  | -17.4    | No                   | No                      | -0.39          | -0.013 |
| HNRH2     | P55795    | >sp P55795 MMLSTEG  | 52.34    |            | IDP                      | 0.9768        | Yes          | 0.9661             | Yes               | +            |                 | 2              | Driver      | 8   | -15.4    | No                   | No                      | -0.60          | -0.004 |
| NOP9      | Q86U38    | >sp Q86U38 MGQGPRS  | 32.86    |            | IDP                      | 0.4991        | No           | 0.6737             | Yes               |              |                 | 3              | Client      | 24  | -4.7     | No                   | No                      | -0.12          | 0.013  |
| RL7       | P18124    | >sp P18124 MEGVEEK  | 39.92    |            | IDP                      | 0.2086        | No           | 0.4144             | No                |              | +               | 1              | Client      | 8   | -6.4     | No                   | No                      | -0.62          | 0.169  |
| NKRF      | Q15226    | >sp Q15226 MEKILQM  | 56.81    |            | IDP                      | 0.8482        | Yes          | 0.4272             | No                |              |                 | 5              | Driver      | 11  | -18      | No                   | No                      | -0.74          | 0.031  |
| U3IP2     | Q43818    | >sp Q43818 MSATAAA  | 36.42    |            | IDP                      | 0.5052        | No           | 0.2709             | No                |              | +               | 3              | Client      | 13  | -15.5    | No                   | No                      | -0.42          | 0.020  |
| GNL3      | Q9BVP2    | >sp Q9BVP2 MKRPKLK  | 50.82    |            | IDP                      | 0.6868        | Yes          | 0.5131             | Yes               | +            |                 | 5              | Driver      | 20  | -18.9    | No                   | No                      | -0.71          | 0.040  |
| PCBP1     | Q15365    | >sp Q15365 MDAGVTE  | 36.52    |            | IDP                      | 0.3965        | No           | 0.5417             | Yes               |              |                 | 2              | Client      | 8   | -4.9     | No                   | No                      | -0.11          | 0.007  |
| BOP1      | Q14137    | >sp Q14137 MAGSRGA  | 42.63    |            | IDP                      | 0.8092        | Yes          | 0.2633             | No                |              |                 | 4              | Driver      | 21  | -13      | No                   | No                      | -0.50          | -0.007 |
| RL13      | P26373    | >sp P26373 MAPSRNG  | 81.04    |            | IDP                      | 0.7586        | Yes          | 0.0102             | No                |              |                 | 2              | Driver      | 3   | -22      | No                   | No                      | -0.85          | 0.194  |
| TBB3      | Q13509    | >sp Q13509 MREIVHIQ | 18.22    |            | Partial IDP              | 0.2876        | No           | 0.0108             | No                |              | +               | 2              | Client      | 16  | -7.6     | No                   | No                      | -0.37          | -0.043 |
| DPM1      | O60762    | >sp O60762 MASEVSE  | 15       |            | Partial IDP              | 0.1368        | No           | 0.0039             | No                |              | +               | 1              | Client      | 10  | 1.6      | Yes                  | No                      | -0.29          | 0.046  |
| IF4A1     | P60842    | >sp P60842 MSASQDS  | 11.58    |            | Partial IDP              | 0.1437        | No           | 0.0132             | No                |              | +               | 1              | Client      | 15  | -4.1     | No                   | No                      | -0.26          | -0.016 |
| NOC2L     | Q9Y3T9    | >sp Q9Y3T9 MAAAGSR  | 41.92    |            | IDP                      | 0.5919        | No           | 0.4504             | No                |              | +               | 3              | Client      | 20  | -10.3    | No                   | No                      | -0.43          | -0.015 |
| RRP1B     | Q14684    | >sp Q14684 MAPAMQ   | 73.09    |            | IDP                      | 0.9785        | Yes          | 0.8648             | Yes               | +            |                 | 7              | Driver      | 8   | -22.4    | No                   | No                      | -0.76          | 0.061  |
| MBB1A     | Q9BQG0    | >sp Q9BQG0 MESRDP   | 40.36    |            | IDP                      | 0.835         | Yes          | 0.4911             | No                |              |                 | 10             | Driver      | 43  | -11.4    | No                   | No                      | -0.43          | 0.039  |
| RBM39     | Q14498    | >sp Q14498 MADDIDIE | 51.89    |            | IDP                      | 0.4127        | No           | 0.5286             | Yes               |              |                 | 1              | Client      | 17  | -18.5    | No                   | No                      | -0.65          | 0.069  |
| NOC3L     | Q8WTT2    | >sp Q8WTT2 MKARRNK  | 53.25    |            | IDP                      | 0.713         | Yes          | 0.1438             | No                |              |                 | 5              | Driver      | 21  | -10.1    | No                   | No                      | -0.54          | 0.041  |
| HEAT1     | Q9H583    | >sp Q9H583 MTSLAQ   | 15.53    |            | Partial IDP              | 0.179         | No           | 0.343              | No                |              | +               | 2              | Client      | 95  | 9.517187 | Yes                  | No                      | 0.06           | 0.000  |
| PESC      | O00541    | >sp O00541 MGGLEKK  | 49.49    |            | IDP                      | 0.6498        | Yes          | 0.0241             | No                |              |                 | 4              | Driver      | 16  | -16.4    | No                   | No                      | -0.69          | 0.009  |
| RS8       | P62241    | >sp P62241 MGISRDN  | 46.63    |            | IDP                      | 0.3264        | No           | 0.0362             | No                |              | +               | 2              | Client      | 4   | -22.3    | No                   | No                      | -1.02          | 0.173  |
| HNRPR     | Q43390    | >sp Q43390 MANQVNC  | 58.77    |            | IDP                      | 0.7561        | Yes          | 0.9003             | Yes               | +            |                 | 4              | Driver      | 12  | -24.4    | No                   | No                      | -0.93          | 0.012  |
| HNRH3     | P31942    | >sp P31942 MDWVVMK  | 63.29    |            | IDP                      | 0.9995        | Yes          | 0.9924             | Yes               | +            |                 | 3              | Driver      | 6   | -22      | No                   | No                      | -0.73          | 0.006  |
| SPB1      | Q8IY81    | >sp Q8IY81 MGKKGKV  | 63.64    |            | IDP                      | 0.8852        | Yes          | 0.5658             | Yes               | +            |                 | 10             | Driver      | 16  | -25.8    | No                   | No                      | -0.83          | 0.015  |
| RBM14     | Q96PK6    | >sp Q96PK6 MKIFVGN  | 81.32    |            | IDP                      | 0.9999        | Yes          | 0.9903             | Yes               | +            |                 | 6              | Driver      | 7   | -15.4    | No                   | No                      | -0.45          | 0.043  |
| RS3A      | P61247    | >sp P61247 MAVGKNK  | 40.91    |            | IDP                      | 0.1592        | No           | 0.806              | Yes               |              |                 | 2              | Client      | 6   | -15      | No                   | No                      | -0.62          | 0.085  |
| RL3       | P39023    | >sp P39023 MSHRKFS  | 37.72    |            | IDP                      | 0.2835        | No           | 0.0437             | No                |              | +               | 2              | Client      | 11  | -11.3    | No                   | No                      | -0.65          | 0.136  |
| TBB4B     | P68371    | >sp P68371 MREIVHLC | 19.33    |            | Partial IDP              | 0.2078        | No           | 0.0074             | No                |              | +               | 1              | Client      | 14  | -7.4     | No                   | No                      | -0.36          | -0.045 |
| TMA16     | Q96EY4    | >sp Q96EY4 MPKAPKG  | 67.49    |            | IDP                      | 0.3322        | No           | 0.0073             | No                |              | +               | 2              | Client      | 1   | -32.8    | No                   | No                      | -1.09          | 0.057  |
| HNRPM     | P52272    | >sp P52272 MAAGVEA  | 76.3     |            | IDP                      | 0.9997        | Yes          | 0.8675             | Yes               | +            |                 | 8              | Driver      | 18  | -14      | No                   | No                      | -0.34          | 0.015  |
| CTBL1     | Q8WYA6    | >sp Q8WYA6 MDVGELL  | 42.98    |            | IDP                      | 0.2228        | No           | 0.0399             | No                |              | +               | 2              | Client      | 18  | -16.6    | No                   | No                      | -0.54          | -0.049 |
| GPTC4     | Q5T310    | >sp Q5T310 MNVTPEV  | 86.32    |            | IDP                      | 0.9984        | Yes          | 0.9327             | Yes               | +            |                 | 3              | Driver      | 2   | -51.8    | No                   | No                      | -1.49          | 0.070  |
| TBB5      | P07437    | >sp P07437 MREIVHIQ | 18.92    |            | Partial IDP              | 0.2479        | No           | 0.0145             | No                |              | +               | 1              | Client      | 15  | -6.8     | No                   |                         |                |        |



|       |        |                   |       |             |        |     |        |     |   |   |    |        |    |       |     |     |       |        |
|-------|--------|-------------------|-------|-------------|--------|-----|--------|-----|---|---|----|--------|----|-------|-----|-----|-------|--------|
| MGN2  | Q96A72 | >sp Q96A MAVASDF  | 16.22 | Partial IDP | 0.1468 | No  | 0.0254 | No  |   | + | 0  | No     | 5  | -1.5  | No  | No  | -0.38 | -0.003 |
| NONO  | Q15233 | >sp Q152 MQSNKTF  | 76.86 | IDP         | 0.9869 | Yes | 0.609  | Yes | + |   | 4  | Driver | 8  | -30.6 | No  | No  | -1.00 | 0.025  |
| RS26  | P62854 | >sp P628 MTKKRRN  | 50.43 | IDP         | 0.8969 | Yes | 0.0222 | No  |   |   | 2  | Driver | 3  | -16.5 | No  | No  | -0.66 | 0.204  |
| NPM   | P06748 | >sp P067 MEDSMDN  | 61.22 | IDP         | 0.9553 | Yes | 0.9884 | Yes | + |   | 2  | Driver | 8  | -35.6 | No  | Yes | -0.97 | -0.073 |
| RRP8  | O43159 | >sp O431 MFEEPEW  | 62.06 | IDP         | 0.9406 | Yes | 0.9612 | Yes | + |   | 4  | Driver | 7  | -24.3 | No  | No  | -0.76 | 0.058  |
| RBM8A | Q9Y5S9 | >sp Q9Y5 MADVLDL  | 61.49 | IDP         | 0.9709 | Yes | 0.0354 | No  |   |   | 3  | Driver | 3  | -38   | No  | No  | -1.15 | -0.020 |
| MCM3  | P25205 | >sp P252 MAGTVVL  | 46.66 | IDP         | 0.6128 | Yes | 0.2455 | No  |   |   | 6  | Driver | 23 | -16.8 | No  | No  | -0.56 | -0.014 |
| RBM28 | Q9NW13 | >sp Q9NV MAGLTLF  | 62.19 | IDP         | 0.9274 | Yes | 0.4076 | No  |   |   | 6  | Driver | 12 | -30.8 | No  | No  | -0.96 | 0.041  |
| MATR3 | P43243 | >sp P432 MSKSFQQ  | 72.02 | IDP         | 0.9982 | Yes | 0.9685 | Yes | + |   | 7  | Driver | 18 | -29.2 | No  | No  | -0.93 | -0.006 |
| RL4   | P36578 | >sp P365 MACARPL  | 50.35 | IDP         | 0.3958 | No  | 0.0503 | No  |   | + | 4  | Client | 11 | -14.3 | No  | No  | -0.61 | 0.177  |
| RS9   | P46781 | >sp P467 MPVARSV  | 28.87 | Partial IDP | 0.2294 | No  | 0.0171 | No  |   | + | 1  | Client | 7  | -13.4 | No  | No  | -0.64 | 0.124  |
| MCM4  | P33991 | >sp P339 MSSPASTP | 35.46 | IDP         | 0.324  | No  | 0.6159 | Yes |   |   | 3  | Client | 29 | -10.7 | No  | No  | -0.41 | 0.003  |
| DDX24 | Q9GZR7 | >sp Q9GZ MKLKDTK  | 49.36 | IDP         | 0.8808 | Yes | 0.8971 | Yes | + |   | 9  | Driver | 20 | -19.1 | No  | No  | -0.66 | 0.034  |
| COPB  | P53618 | >sp P536 MTAAENV  | 23.82 | Partial IDP | 0.282  | No  | 0.156  | No  |   | + | 2  | Client | 34 | 1     | Yes | No  | -0.09 | -0.008 |
| HNRPC | P07910 | >sp P079 MASNVTN  | 75.82 | IDP         | 0.9961 | Yes | 0.7935 | Yes | + |   | 3  | Driver | 5  | -35.4 | No  | No  | -0.98 | -0.036 |
| SIN3A | Q96ST3 | >sp Q96S MKRRLDD  | 48.55 | IDP         | 0.851  | Yes | 0.9604 | Yes | + |   | 8  | Driver | 29 | -16.2 | No  | No  | -0.69 | 0.012  |
| RS24  | P62847 | >sp P628 MNDTVTI  | 47.37 | IDP         | 0.202  | No  | 0.2207 | No  |   | + | 1  | Client | 3  | -21   | No  | No  | -0.99 | 0.203  |
| DDX50 | Q9BQ39 | >sp Q9BQ MPGKLLW  | 38.81 | IDP         | 0.5348 | No  | 0.9234 | Yes |   |   | 2  | Client | 22 | -20.2 | No  | No  | -0.71 | 0.037  |
| ETFA  | P13804 | >sp P138 MFRAAAP  | 19.52 | Partial IDP | 0.2221 | No  | 0.0106 | No  |   | + | 1  | Client | 14 | 2.9   | Yes | No  | 0.15  | 0.020  |
| RL10A | P62906 | >sp P629 MSSKVSR  | 32.26 | IDP         | 0.1548 | No  | 0.0108 | No  |   | + | 1  | Client | 6  | -5.5  | No  | No  | -0.41 | 0.111  |
| MRT4  | Q9UKD2 | >sp Q9UK MPKSKRD  | 32.22 | IDP         | 0.2086 | No  | 0.0172 | No  |   | + | 1  | Client | 6  | -15.8 | No  | No  | -0.71 | 0.015  |
| RL15  | P61313 | >sp P613 MGAYKYC  | 51.47 | IDP         | 0.6722 | Yes | 0.0107 | No  |   |   | 2  | Driver | 5  | -16.8 | No  | No  | -0.93 | 0.218  |
| SF3B3 | Q15393 | >sp Q153 MFLYNLT  | 16.68 | Partial IDP | 0.1376 | No  | 0.0812 | No  |   | + | 5  | Client | 47 | -0.6  | No  | No  | -0.17 | -0.025 |
| TBA1B | P68363 | >sp P683 MRECISIH | 16.63 | Partial IDP | 0.1976 | No  | 0.0132 | No  |   | + | 1  | Client | 19 | -3.1  | No  | No  | -0.23 | -0.039 |
| NOL11 | Q9H8H0 | >sp Q9H8 MAALEEE  | 21.97 | Partial IDP | 0.1517 | No  | 0.1976 | No  |   | + | 1  | Client | 29 | 4.1   | Yes | No  | -0.11 | -0.008 |
| RBM19 | Q9Y4C8 | >sp Q9Y4 MSRLIVKN | 58.96 | IDP         | 0.9431 | Yes | 0.898  | Yes | + |   | 5  | Driver | 26 | -22.7 | No  | No  | -0.75 | -0.001 |
| RL17  | P18621 | >sp P186 MVRYSLD  | 45.11 | IDP         | 0.1848 | No  | 0.0159 | No  |   | + | 0  | No     | 3  | -21.2 | No  | No  | -0.90 | 0.141  |
| DDX54 | Q8TDD1 | >sp Q8TD MAADKGP  | 57.32 | IDP         | 0.9391 | Yes | 0.6687 | Yes | + |   | 8  | Driver | 22 | -21.1 | No  | No  | -0.68 | 0.065  |
| RL12  | P30050 | >sp P300 MPPKFDP  | 23.64 | Partial IDP | 0.1717 | No  | 0.0066 | No  |   | + | 0  | No     | 5  | -12.6 | No  | No  | -0.35 | 0.055  |
| RPF2  | Q9H7B2 | >sp Q9H7 MDTLDRV  | 47.39 | IDP         | 0.2631 | No  | 0.0298 | No  |   | + | 1  | Client | 7  | -11   | No  | No  | -0.68 | 0.119  |
| WDR3  | Q9UNX4 | >sp Q9UN MGLTKQY  | 28.53 | Partial IDP | 0.2985 | No  | 0.0466 | No  |   | + | 4  | Client | 36 | -3.2  | No  | No  | -0.26 | 0.002  |
| OZF   | Q15072 | >sp Q150 MSHLSQQ  | 69.52 | IDP         | 0.269  | No  | 0.1973 | No  |   | + | 2  | Client | 4  | -22.1 | No  | No  | -0.88 | 0.106  |
| DDX56 | Q9NY93 | >sp Q9NY MEDSEAL  | 30.71 | IDP         | 0.2624 | No  | 0.0198 | No  |   | + | 2  | Client | 12 | -4.8  | No  | No  | -0.27 | 0.043  |
| HSP76 | P17066 | >sp P170 MQAPREL  | 32.66 | IDP         | 0.2901 | No  | 0.2186 | No  |   | + | 2  | Client | 17 | -15   | No  | No  | -0.46 | -0.006 |
| RPAB3 | P52434 | >sp P524 MAGILFED | 25.33 | Partial IDP | 0.1667 | No  | 0.0027 | No  |   | + | 1  | Client | 6  | -5.8  | No  | No  | -0.34 | -0.073 |
| IF4A3 | P38919 | >sp P389 MATTATM  | 18.73 | Partial IDP | 0.1758 | No  | 0.017  | No  |   | + | 1  | Client | 15 | -2.9  | No  | No  | -0.26 | 0.001  |
| MYH14 | Q7Z406 | >sp Q7Z4 MAAVTMS  | 69.27 | IDP         | 0.9776 | Yes | 0.5611 | Yes | + |   | 18 | Driver | 28 | -29.2 | No  | No  | -0.81 | -0.016 |
| CMS1  | Q9BQ75 | >sp Q9BQ MADDLGD  | 42.65 | IDP         | 0.2969 | No  | 0.0918 | No  |   | + | 1  | Client | 9  | -10.7 | No  | No  | -0.50 | 0.043  |
| WDR75 | Q8IWA0 | >sp Q8IW MVVEENIR | 22.77 | Partial IDP | 0.2123 | No  | 0.6001 | Yes |   |   | 1  | Client | 28 | 0.3   | Yes | No  | -0.25 | -0.011 |
| HNRPK | P61978 | >sp P619 METEQPE  | 56.8  | IDP         | 0.9031 | Yes | 0.2392 | No  |   |   | 4  | Driver | 9  | -19.7 | No  | No  | -0.70 | -0.013 |
| RL9   | P32969 | >sp P329 MKTILSNC | 7.81  | Ordered     | 0.092  | No  | 0.0241 | No  |   | + | 0  | No     | 8  | -4.3  | No  | No  | -0.35 | 0.076  |
| MK67I | Q9BYG3 | >sp Q9BY MATFSGP  | 69.62 | IDP         | 0.587  | No  | 0.8185 | Yes |   |   | 4  | Client | 5  | -21.1 | No  | No  | -0.95 | 0.082  |
| SMD3  | P62318 | >sp P623 MSIGVPIK | 41.27 | IDP         | 0.2632 | No  | 0.0185 | No  |   | + | 1  | Client | 6  | -11.4 | No  | No  | -0.43 | 0.103  |
| RL18A | Q02543 | >sp Q025 MKASGTL  | 38.64 | IDP         | 0.1807 | No  | 0.0071 | No  |   | + | 1  | Client | 7  | -7.4  | No  | No  | -0.67 | 0.182  |
| RS4X  | P62701 | >sp P627 MARGPKK  | 13.31 | Partial IDP | 0.1382 | No  | 0.0053 | No  |   | + | 0  | No     | 10 | -3.3  | No  | No  | -0.33 | 0.106  |
| ELAV1 | Q15717 | >sp Q157 MSNGYED  | 25.46 | Partial IDP | 0.1844 | No  | 0.0132 | No  |   | + | 0  | No     | 14 | -6    | No  | No  | -0.36 | 0.034  |
| RL6   | Q02878 | >sp Q028 MAGEKVE  | 61.46 | IDP         | 0.5433 | No  | 0.1071 | No  |   | + | 2  | Client | 10 | -12.9 | No  | No  | -0.73 | 0.194  |
| RL7A  | P62424 | >sp P624 MPKGKKA  | 41.73 | IDP         | 0.3147 | No  | 0.566  | Yes |   |   | 3  | Client | 10 | -12.1 | No  | No  | -0.55 | 0.162  |
| WDR12 | Q9GZL7 | >sp Q9GZ MAQLQTR  | 20.09 | Partial IDP | 0.2042 | No  | 0.0197 | No  |   | + | 1  | Client | 11 | -6    | No  | No  | -0.39 | -0.014 |
| AP2B1 | P63010 | >sp P630 MTDSKYFT | 20.49 | Partial IDP | 0.1488 | No  | 0.1223 | No  |   | + | 1  | Client | 40 | 2.2   | Yes | No  | -0.09 | -0.019 |
| RL8   | P62917 | >sp P629 MGRVIRG  | 44.75 | IDP         | 0.3036 | No  | 0.5649 | Yes |   |   | 2  | Client | 9  | -13.9 | No  | No  | -0.53 | 0.163  |
| RL14  | P50914 | >sp P509 MVFRRFV  | 59.07 | IDP         | 0.3178 | No  | 0.0519 | No  |   | + | 2  | Client | 3  | -16.9 | No  | No  | -0.51 | 0.188  |
| T2EA  | P29083 | >sp P290 MADPDVL  | 57.18 | IDP         | 0.7727 | Yes | 0.0218 | No  |   |   | 4  | Driver | 8  | -22.1 | No  | No  | -0.64 | -0.067 |
| MAK16 | Q9BXY0 | >sp Q9BX MQSDDVI  | 53.33 | IDP         | 0.8313 | Yes | 0.0099 | No  |   |   | 3  | Driver | 5  | -30.9 | No  | No  | -1.08 | -0.025 |
| RS2   | P15880 | >sp P158 MADDAGA  | 28.67 | Partial IDP | 0.3865 | No  | 0.9444 | Yes |   |   | 2  | Client | 11 | -4.3  | No  | No  | -0.23 | 0.096  |
| NOP2  | P46087 | >sp P460 MGRKLDP  | 64.78 | IDP         | 0.988  | Yes | 0.9598 | Yes | + |   | 3  | Driver | 15 | -26.2 | No  | No  | -0.81 | 0.031  |
| DDX52 | Q9Y2R4 | >sp Q9Y2 MDVHDLF  | 32.72 | IDP         | 0.328  | No  | 0.9494 | Yes |   |   | 3  | Client | 23 | -8.8  | No  | No  | -0.44 | 0.061  |
| PAK6  | Q9NQU5 | >sp Q9NQ MFRKKKK  | 55.36 | IDP         | 0.8415 | Yes | 0.7771 | Yes | + |   | 2  | Driver | 16 | -11.7 | No  | No  | -0.48 | 0.043  |
| RS5   | P46782 | >sp P467 MTEWETA  | 25    | Partial IDP | 0.2268 | No  | 0.0026 | No  |   | + | 0  | No     | 4  | -9.6  | No  | No  | -0.38 | 0.064  |
| RS16  | P62249 | >sp P622 MPSKGPL  | 25.34 | Partial IDP | 0.1274 | No  | 0.0277 | No  |   | + | 1  | Client | 8  | -5.8  | No  | No  | -0.44 | 0.130  |
| RALY  | Q9UKM9 | >sp Q9UK MSLKLQA  | 65.36 | IDP         | 0.8212 | Yes | 0.9803 | Yes | + |   | 2  | Driver | 7  | -23.5 | No  | No  | -0.64 | 0.026  |
| PRP6  | O94906 | >sp O949 MNKKKKP  | 41.02 | IDP         | 0.5365 | No  | 0.1299 | No  |   | + | 4  | Client | 23 | -18.7 | No  | No  | -0.64 | 0.018  |
| UTP15 | Q8TED0 | >sp Q8TE MAGYKPV  | 17.37 | Partial IDP | 0.1323 | No  | 0.0501 | No  |   | + | 1  | Client | 18 | -0.6  | No  | No  | -0.29 | 0.041  |
| DCA13 | Q9NV06 | >sp Q9NV MKVKMLS  | 26.74 | Partial IDP | 0.156  | No  | 0.0331 | No  |   | + | 0  | No     | 11 | -8.3  | No  | No  | -0.51 | 0.057  |
| RS6   | P62753 | >sp P627 MKLNISFP | 60.64 | IDP         | 0.6884 | Yes | 0.3517 | No  |   |   | 2  | Driver | 5  | -24.4 | No  | No  | -0.95 | 0.175  |
| RS25  | P62851 | >sp P628 MPPKDDK  | 46.4  | IDP         | 0.8546 | Yes | 0.0689 | No  |   |   | 2  | Driver | 5  | -26.9 | No  | No  | -0.86 | 0.156  |
| RL30  | P62888 | >sp P628 MVAAKKT  | 25.22 | Partial IDP | 0.1203 | No  | 0.0147 | No  |   | + | 1  | Client | 5  | -2.3  | No  | No  | -0.29 | 0.096  |
| RS15A | P62244 | >sp P622 MVRMNV   | 16.15 | Partial IDP | 0.1088 | No  | 0.004  | No  |   | + | 0  | No     | 8  | 2.2   | Yes | No  | -0.12 | 0.092  |
| CENPV | Q7Z7K6 | >sp Q7Z7 MRRSRSS  | 56.73 | IDP         | 0.9263 | Yes | 0.9385 | Yes | + |   | 1  | Driver | 8  | -23.3 | No  | No  | -0.74 | 0.078  |



**Table S2.** Characteristics of the proteome of the acidosis-induced A-bodies. DPR are droplet-promoting regions, nHS are number of aggregation hot spots, Na4vSS are Normalized a4v Sequence Sum for 100 residues used for aggregation prediction.

| Gene Name | UniProtID | Fasta                | Sequence | PER(VSL2B)  | Disorder Classifications | FuzDrop Score | FuzDrop LLPS | PSPredictor Score | PSPredictor LLPS | Fuz&PSP LLPS | Fuz&PSP No LLPS | Number of DPRs | Role in MLO | nHS | Na4vSS | Agregation Predicted | Aggregation DB scanning | Hydrophobicity | Charge |
|-----------|-----------|----------------------|----------|-------------|--------------------------|---------------|--------------|-------------------|------------------|--------------|-----------------|----------------|-------------|-----|--------|----------------------|-------------------------|----------------|--------|
| VHL       | P40337    | >sp P40337 MPRRAENV  | 55.87    | IDP         | 0.6579                   | Yes           | 0.0102       | No                |                  |              |                 | 2              | Driver      | 6   | -23.0  | No                   | Yes                     | -0.78          | -0.073 |
| AKAP13    | Q12802    | >sp Q12802 MKLNPQQ   | 75.97    | IDP         | 1.0000                   | Yes           | 0.7561       | Yes               | +                |              |                 | 30             | Driver      | 46  | -22.7  | No                   | No                      | -0.64          | -0.030 |
| HERC2     | O95714    | >sp O95714 MPSESFCLA | 28.57    | Partial IDP | 0.9976                   | Yes           | 0.3504       | No                |                  |              |                 | 28             | Driver      | 153 | -5.0   | No                   | No                      | -0.19          | -0.005 |
| NOSIP     | Q9Y314    | >sp Q9Y314 MTRHGKN   | 54.49    | IDP         | 0.8464                   | Yes           | 0.0313       | No                |                  |              |                 | 2              | Driver      | 6   | -15.1  | No                   | No                      | -0.52          | 0.040  |
| HSPB1     | P04792    | >sp P04792 MTERRVPP  | 57.56    | IDP         | 0.6398                   | Yes           | 0.0151       | No                |                  |              |                 | 2              | Driver      | 3   | -13.1  | No                   | No                      | -0.57          | -0.002 |
| PPIA      | P62937    | >sp P62937 MVNPPTVF  | 20.61    | Partial IDP | 0.2089                   | No            | 0.0057       | No                |                  | +            |                 | 0              | No          | 7   | -6.7   | No                   | No                      | -0.32          | 0.018  |
| HSPA1A    | P08107    | >sp P08107 MAKAAAIG  | 29.64    | Partial IDP | 0.3928                   | No            | 0.1251       | No                |                  | +            |                 | 2              | Client      | 18  | -12.3  | No                   | No                      | -0.38          | -0.012 |
| CIRBP     | Q14011    | >sp Q14011 MASDEGKL  | 77.91    | IDP         | 0.9977                   | Yes           | 0.9806       | Yes               | +                |              |                 | 1              | Driver      | 4   | -32.7  | No                   | No                      | -1.06          | 0.032  |
| LYZ       | P61626    | >sp P61626 MKALIVLG  | 8.11     | Ordered     | 0.1266                   | No            | 0.0241       | No                |                  | +            |                 | 0              | No          | 5   | -2.6   | No                   | Yes                     | -0.19          | 0.064  |
| PABPN1    | Q86U42    | >sp Q86U42 MAAAAAA   | 76.14    | IDP         | 0.9558                   | Yes           | 0.9338       | Yes               | +                |              |                 | 2              | Driver      | 4   | -30.7  | No                   | No                      | -0.82          | -0.036 |
| HNRNPA1   | P09651    | >sp P09651 MSKSESPK  | 70.16    | IDP         | 0.9998                   | Yes           | 0.9977       | Yes               | +                |              |                 | 1              | Driver      | 7   | -27.8  | No                   | No                      | -0.89          | 0.030  |
| ANP32B    | Q92688    | >sp Q92688 MDMKRRRI  | 61.75    | IDP         | 0.4995                   | No            | 0.5683       | Yes               |                  |              |                 | 1              | Client      | 3   | -47.7  | No                   | No                      | -1.16          | -0.263 |
| PTBP1     | P26599    | >sp P26599 MDGIVPDI  | 43.27    | IDP         | 0.5386                   | No            | 0.9415       | Yes               |                  |              |                 | 4              | Client      | 25  | -2.7   | No                   | No                      | -0.12          | 0.030  |
| PTGES3    | Q15185    | >sp Q15185 MQPASAKV  | 56.88    | IDP         | 0.7660                   | Yes           | 0.1522       | No                |                  |              |                 | 1              | Driver      | 4   | -35.0  | No                   | No                      | -1.05          | -0.116 |
| EEF1B2    | P24534    | >sp P24534 MGFGDLKS  | 40.89    | IDP         | 0.4031                   | No            | 0.1355       | No                |                  | +            |                 | 2              | Client      | 7   | -17.1  | No                   | No                      | -0.49          | -0.076 |
| YBX1      | P67809    | >sp P67809 MSSEAEQT  | 82.41    | IDP         | 0.9970                   | Yes           | 0.984        | Yes               | +                |              |                 | 2              | Driver      | 1   | -47.4  | No                   | No                      | -1.48          | 0.049  |
| CCT4      | P50991    | >sp P50991 MPENVAPF  | 22.82    | Partial IDP | 0.2193                   | No            | 0.1655       | No                |                  | +            |                 | 1              | Client      | 23  | -0.1   | No                   | No                      | 0.03           | 0.009  |
| SYMPK     | Q92797    | >sp Q92797 MASGSGDS  | 35.56    | IDP         | 0.9426                   | Yes           | 0.5602       | Yes               | +                |              |                 | 7              | Driver      | 49  | -3.9   | No                   | No                      | -0.20          | -0.005 |
| ATRX      | P46100    | >sp P46100 MTAEPMS   | 72.03    | IDP         | 0.9989                   | Yes           | 0.9671       | Yes               | +                |              |                 | 17             | Driver      | 37  | -32.6  | No                   | No                      | -1.06          | 0.000  |
| TAF15     | Q92804    | >sp Q92804 MSDSGSYG  | 92.57    | IDP         | 1.0000                   | Yes           | 0.9952       | Yes               | +                |              |                 | 4              | Driver      | 3   | -50.1  | No                   | No                      | -1.52          | 0.009  |
| BLVRB     | P30043    | >sp P30043 MAVKKIAIF | 16.99    | Partial IDP | 0.1735                   | No            | 0.0317       | No                |                  |              | +               | 1              | Client      | 9   | -1.2   | No                   | No                      | -0.06          | 0.022  |
| HNRNPH1   | P31943    | >sp P31943 MMLGTGEG  | 51.22    | IDP         | 0.9486                   | Yes           | 0.9727       | Yes               | +                |              |                 | 3              | Driver      | 9   | -16.0  | No                   | No                      | -0.60          | -0.004 |
| HNRNPC    | P07910    | >sp P07910 MASNVTNI  | 75.82    | IDP         | 0.9961                   | Yes           | 0.7935       | Yes               | +                |              |                 | 3              | Driver      | 5   | -35.4  | No                   | No                      | -0.98          | -0.036 |
| WDR46     | Q15213    | >sp Q15213 METAPKPG  | 47.05    | IDP         | 0.7993                   | Yes           | 0.7594       | Yes               | +                |              |                 | 4              | Driver      | 19  | -16.9  | No                   | No                      | -0.60          | 0.062  |
| NCL       | P19338    | >sp P19338 MVKLAKAG  | 86.2     | IDP         | 0.9872                   | Yes           | 0.941        | Yes               | +                |              |                 | 7              | Driver      | 14  | -45.4  | No                   | No                      | -1.13          | -0.084 |
| RSBN1     | Q5VVWQ0   | >sp Q5VVWQ0 MFISGRRT | 51.87    | IDP         | 0.8958                   | Yes           | 0.9117       | Yes               | +                |              |                 | 8              | Driver      | 15  | -18.7  | No                   | No                      | -0.66          | 0.032  |
| YWHAZ     | P63104    | >sp P63104 MDKNELVQ  | 53.88    | IDP         | 0.2169                   | No            | 0.0048       | No                |                  | +            |                 | 1              | Client      | 6   | -18.2  | No                   | No                      | -0.62          | -0.055 |
| FOXA1     | P55317    | >sp P55317 MLGTVKMG  | 83.9     | IDP         | 0.9998                   | Yes           | 0.9673       | Yes               | +                |              |                 | 4              | Driver      | 12  | -14.2  | No                   | No                      | -0.48          | 0.028  |
| ACTBL2    | Q562R1    | >sp Q562R1 MTDNELSA  | 14.1     | Partial IDP | 0.1639                   | No            | 0.0223       | No                |                  |              | +               | 0              | No          | 16  | 0.8    | Yes                  | No                      | -0.19          | -0.016 |
| XRCC6     | P12956    | >sp P12956 MSGWESY   | 43.19    | IDP         | 0.3735                   | No            | 0.4906       | No                |                  |              | +               | 3              | Client      | 19  | -9.8   | No                   | No                      | -0.54          | 0.001  |
| HNRNPD    | Q14103    | >sp Q14103 MSEEQFGG  | 83.1     | IDP         | 0.9960                   | Yes           | 0.9949       | Yes               | +                |              |                 | 2              | Driver      | 7   | -27.1  | No                   | No                      | -0.92          | 0.010  |
| HNRNPA3   | P51991    | >sp P51991 MEVKPPPG  | 70.11    | IDP         | 0.9994                   | Yes           | 0.9966       | Yes               | +                |              |                 | 2              | Driver      | 6   | -30.9  | No                   | No                      | -0.99          | 0.030  |
| RPL29     | P47914    | >sp P47914 MAKSKNHT  | 100      | IDP         | 0.8048                   | Yes           | 0.6051       | Yes               | +                |              |                 | 2              | Driver      | 1   | -34.1  | No                   | No                      | -1.09          | 0.267  |
| ZC3H18    | Q86VM9    | >sp Q86VM9 MDVAESPE  | 92.86    | IDP         | 0.9998                   | Yes           | 0.9929       | Yes               | +                |              |                 | 4              | Driver      | 5   | -54.1  | No                   | No                      | -1.59          | 0.010  |
| ISY1      | Q9ULR0    | >sp Q9ULR0 MARNAEKA  | 72.98    | IDP         | 0.5749                   | No            | 0.2225       | No                |                  |              | +               | 1              | Client      | 2   | -31.0  | No                   | No                      | -1.00          | -0.037 |
| HNRNPK    | P61978    | >sp P61978 METEQPEE  | 56.8     | IDP         | 0.9031                   | Yes           | 0.2392       | No                |                  |              |                 | 4              | Driver      | 9   | -19.7  | No                   | No                      | -0.70          | -0.013 |
| SEC22B    | Q75396    | >sp Q75396 MVLLTMIA  | 32.09    | IDP         | 0.2068                   | No            | 0.0114       | No                |                  |              | +               | 1              | Client      | 6   | 1.8    | Yes                  | No                      | -0.18          | 0.021  |
| HNRNPA2   | P22626    | >sp P22626 MEKTLLET  | 69.97    | IDP         | 0.9808                   | Yes           | 0.9977       | Yes               | +                |              |                 | 2              | Driver      | 4   | -26.5  | No                   | No                      | -0.93          | 0.024  |
| TTLL12    | Q14166    | >sp Q14166 MEAERGPE  | 15.22    | Partial IDP | 0.2019                   | No            | 0.2262       | No                |                  |              | +               | 3              | Client      | 20  | -5.3   | No                   | No                      | -0.39          | -0.025 |
| PCBP1     | Q15365    | >sp Q15365 MDAGVTE   | 36.52    | IDP         | 0.3965                   | No            | 0.5417       | Yes               |                  |              |                 | 2              | Client      | 8   | -4.9   | No                   | No                      | -0.11          | 0.007  |
| HNRNPA0   | Q13151    | >sp Q13151 MENSQLCK  | 61.97    | IDP         | 0.9818                   | Yes           | 0.9959       | Yes               | +                |              |                 | 1              | Driver      | 5   | -20.5  | No                   | No                      | -0.59          | 0.043  |
| RBM3      | P98179    | >sp P98179 MSSEEGKL  | 65.61    | IDP         | 0.9952                   | Yes           | 0.9542       | Yes               | +                |              |                 | 1              | Driver      | 3   | -32.4  | No                   | No                      | -1.09          | 0.025  |
| HNRNPCL   | O60812    | >sp O60812 MASNVTNI  | 67.58    | IDP         | 0.9744                   | Yes           | 0.75         | Yes               | +                |              |                 | 3              | Driver      | 4   | -34.8  | No                   | No                      | -0.96          | -0.039 |
| RBM39     | Q14498    | >sp Q14498 MADDIDIE  | 51.89    | IDP         | 0.4127                   | No            | 0.5286       | Yes               |                  |              |                 | 1              | Client      | 17  | -18.5  | No                   | No                      | -0.65          | 0.069  |
| TAF6      | P49848    | >sp P49848 MAEEKKLG  | 49.78    | IDP         | 0.9420                   | Yes           | 0.9754       | Yes               | +                |              |                 | 3              | Driver      | 24  | -7.1   | No                   | No                      | -0.30          | 0.021  |
| LUC7L2    | Q9Y383    | >sp Q9Y383 MSAQAQMG  | 74.49    | IDP         | 0.9512                   | Yes           | 0.0666       | No                |                  |              |                 | 3              | Driver      | 2   | -50.2  | No                   | No                      | -1.49          | 0.088  |
| DMD       | P11532    | >sp P11532 MLWWEEV   | 53.57    | IDP         | 0.8268                   | Yes           | 0.8378       | Yes               | +                |              |                 | 15             | Driver      | 83  | -18.7  | No                   | No                      | -0.69          | -0.012 |
| TADA2B    | Q86TJ2    | >sp Q86TJ2 MAELGKKY  | 48.57    | IDP         | 0.3565                   | No            | 0.0117       | No                |                  |              | +               | 2              | Client      | 9   | -17.7  | No                   | No                      | -0.73          | 0.018  |
| VPS13C    | Q709C8    | >sp Q709C8 MVLESVVA  | 25.74    | Partial IDP | 0.7815                   | Yes           | 0.5435       | Yes               | +                |              |                 | 11             | Driver      | 133 | 0.1    | Yes                  | No                      | -0.21          | 0.004  |
| ELAVL1    | Q15717    | >sp Q15717 MSNGYED   | 25.46    | Partial IDP | 0.1844                   | No            | 0.0132       | No                |                  |              | +               | 0              | No          | 14  | -6.0   | No                   | No                      | -0.36          | 0.034  |
| ACTB      | P60709    | >sp P60709 MDDDIAAL  | 16.27    | Partial IDP | 0.2880                   | No            | 0.0145       | No                |                  |              | +               | 0              | No          | 14  | -0.4   | No                   | No                      | -0.20          | -0.020 |
| TPI1      | P60174    | >sp P60174 MAPSRKFF  | 10.44    | Partial IDP | 0.1235                   | No            | 0.0406       | No                |                  |              | +               | 0              | No          | 10  | -3.2   | No                   | Yes                     | -0.12          | 0.004  |
| DDX39A    | O00148    | >sp O00148 MAEQDVE   | 18.27    | Partial IDP | 0.1354                   | No            | 0.0079       | No                |                  |              | +               | 1              | Client      | 16  | -4.0   | No                   | No                      | -0.30          | -0.016 |
| MAGED2    | Q9UNF1    | >sp Q9UNF1 MSDTSSEG  | 72.11    | IDP         | 0.9989                   | Yes           | 0.9609       | Yes               | +                |              |                 | 5              | Driver      | 11  | -20.2  | No                   | No                      | -0.53          | 0.029  |
| RPL19     | P84098    | >sp P84098 MSMLRLQ   | 67.86    | IDP         | 0.5770                   | No            | 0.0112       | No                |                  |              | +               | 2              | Client      | 4   | -28.5  | No                   | No                      | -1.11          | 0.240  |
| RFC1      | P35251    | >sp P35251 MDIRKFFG  | 64.02    | IDP         | 0.9781                   | Yes           | 0.7704       | Yes               | +                |              |                 | 9              | Driver      | 26  | -24.4  | No                   | No                      | -0.87          | 0.047  |
| RPLP2     | P05387    | >sp P05387 MRVVASYL  | 62.61    | IDP         | 0.8018                   | Yes           | 0.7132       | Yes               | +                |              |                 | 1              | Driver      | 6   | -20.5  | No                   | No                      | -0.24          | -0.078 |
| SRSF2     | Q01130    | >sp Q01130 MSYGRPPF  | 83.71    | IDP         | 0.9964                   | Yes           | 0.9881       | Yes               | +                |              |                 | 1              | Driver      | 2   | -45.8  | No                   | No                      | -1.62          | 0.206  |
| C8orf33   | Q9H7E9    | >sp Q9H7E9 MAALGHLA  | 82.97    | IDP         | 0.9495                   | Yes           | 0.4041       | No                |                  |              |                 | 3              | Driver      | 4   | -29.0  | No                   | No                      | -0.74          | 0.076  |
| HNRNPM    | P52272    | >sp P52272 MAAGVEA   | 76.3     | IDP         | 0.9997                   | Yes           | 0.8675       | Yes               | +                |              |                 | 8              | Driver      | 18  | -14.0  | No                   | No                      | -0.34          | 0.015  |
| SNRPD1    | P62314    | >sp P62314 MKLVRFLL  | 34.45    | IDP         | 0.3072                   | No            | 0.0353       | No                |                  |              | +               | 1              | Client      | 5   | -14.7  | No                   | No                      | -0.58          | 0.147  |
| DDX6      | P26196    | >sp P26196 MSTARTEN  | 27.54    | Partial IDP | 0.3308                   | No            | 0.3039       | No                |                  |              | +               | 2              | Client      | 20  | -4.4   | No                   | No                      | -0.32          | 0.026  |
| ACTC1     | P68032    | >sp P68032 MCDDDETT  | 16.71    | Partial IDP | 0.3178                   | No            | 0.0135       | No                |                  |              | +               | 1              | Client      | 13  | -1.5   | No                   | No                      | -0.23          | -0.023 |
| NAP1L1    | P55209    | >sp P55209 MADIDNKE  | 56.52    | IDP         | 0.7162                   | Yes           | 0.273        | No                |                  |              |                 | 4              | Driver      | 7   | -30.4  | No                   | No                      | -0.95          | -0.130 |
| PCBP2     | Q15366    | >sp Q15366 MDTGVIEG  | 44.93    | IDP         | 0.9028                   | Yes           | 0.2466       | No                |                  |              |                 | 3              | Driver      | 10  | -3.4   | No                   | No                      | -0.14          | 0.003  |
| RPS7      | P62081    | >sp P62081 MFSSSAKIV | 44.85    | IDP         | 0.2431                   | No            | 0.0164       | No                |                  |              | +               | 2              | Client      | 7   | -8.4   | No                   | No                      | -0.46          | 0.088  |
| DDX5      | P17844    | >sp P17844 MSGYSSDR  | 41.04    | IDP         | 0.5261                   | No            | 0.4192       | No                |                  |              | +               | 3              | Client      | 18  | -16.0  | No                   | No                      | -0.64          | 0.029  |
| MGMT      | P16455    | >sp P16455 MDKDCDEM  | 35.75    | IDP         | 0.4840                   | No            | 0.0359       | No                |                  |              | +               | 1              | Client      | 5   | -2.5   | No                   | No                      | -0.04          | 0.027  |
| GTF2F1    | P35269    | >sp P35269 MAALGPSS  | 82.01    | IDP         | 0.9976                   | Yes           | 0.9457       | Yes               | +                |              |                 | 2              | Driver      | 6   | -43.4  | No                   | No                      | -1.32          | 0.005  |
| EIF4H     | Q15056    | >sp Q15056 MADFDTYQ  | 72.18    | IDP         | 0.9945                   | Yes           | 0.856        | Yes               | +                |              |                 | 2              | Driver      | 3   | -33.8  | No                   | No                      | -1.01          | 0.002  |
| SARNP     | P82979    | >sp P82979 MATETVEL  | 99.05    | IDP         | 0.9812                   | Yes           | 0.3577       | No                |                  |              |                 | 4              | Driver      | 4   | -32.2  | No                   | No                      | -0.91          | -0.002 |
| SF3A3     | Q12874    | >sp Q12874 METILEQQ  | 52.3     | IDP         | 0.4000                   | No            | 0.0487       | No                |                  |              | +               | 4              | Client      | 9   | -23.8  | No                   | No                      | -0.92          | -0.030 |
| TRIM28    | Q13263    | >sp Q13263 MAASAAA   | 63.11    | IDP         | 0.9946                   | Yes           | 0.9829       | Yes               | +                |              |                 | 6              | Driver      | 18  | -17.4  | No                   | No                      | -0.39          | -0.013 |
| SUGP1     | Q8IWZ8    | >sp Q8IWZ8 MSLKMDN   | 86.51    | IDP         | 0.9973                   | Yes           | 0.9666       | Yes               | +                |              |                 | 9              | Driver      | 8   | -25.8  | No                   | No                      | -0.89          | 0.009  |
| EIF3K     | Q9UBQ5    | >sp Q9UBQ5 MAMFEQN   | 16.06    | Partial IDP | 0.1250                   | No            | 0.0154       | No                |                  |              | +               | 1              | Client      | 10  | 0.2    | Yes                  | No                      | -0.17          | -0.044 |
| SP1       | P08047    | >sp P08047 MSDQDHS   | 7        |             |                          |               |              |                   |                  |              |                 |                |             |     |        |                      |                         |                |        |



|          |        |            |           |       |             |        |     |        |     |   |   |    |        |    |       |     |    |       |        |
|----------|--------|------------|-----------|-------|-------------|--------|-----|--------|-----|---|---|----|--------|----|-------|-----|----|-------|--------|
| HBA1     | P69905 | >sp P69905 | MVLSPADK  | 20.42 | Partial IDP | 0.1494 | No  | 0.0034 | No  |   | + | 0  | No     | 5  | 1.1   | Yes | No | 0.05  | 0.049  |
| SNRPD3   | P62318 | >sp P62318 | MSIGVPIKV | 41.27 | IDP         | 0.2632 | No  | 0.0185 | No  |   | + | 1  | Client | 6  | -11.4 | No  | No | -0.43 | 0.103  |
| ZGPAT    | Q8N5A5 | >sp Q8N5A5 | MDEESLES  | 70.62 | IDP         | 0.9725 | Yes | 0.746  | Yes | + |   | 6  | Driver | 12 | -24.0 | No  | No | -0.59 | -0.022 |
| GATAD2B  | Q8WXI9 | >sp Q8WXI9 | MDRMTED   | 83.14 | IDP         | 0.9217 | Yes | 0.8894 | Yes | + |   | 6  | Driver | 11 | -19.7 | No  | No | -0.61 | 0.046  |
| UBE2E1   | P51965 | >sp P51965 | MSDDDSRA  | 45.08 | IDP         | 0.7531 | Yes | 0.1172 | No  |   |   | 1  | Driver | 6  | -12.5 | No  | No | -0.58 | 0.026  |
| NOP9     | Q86U38 | >sp Q86U38 | MGQGPRS   | 32.86 | IDP         | 0.4991 | No  | 0.6737 | Yes |   |   | 3  | Client | 24 | -4.7  | No  | No | -0.12 | 0.013  |
| CDK1     | P06493 | >sp P06493 | MEDYTKIEH | 12.12 | Partial IDP | 0.1467 | No  | 0.0056 | No  |   | + | 0  | No     | 11 | 2.2   | Yes | No | -0.28 | 0.020  |
| CHTOP    | Q9Y3Y2 | >sp Q9Y3Y2 | MAAQSAPI  | 100   | IDP         | 0.9270 | Yes | 0.9882 | Yes | + |   | 3  | Driver | 2  | -27.8 | No  | No | -0.71 | 0.159  |
| SMNDC1   | O75940 | >sp O75940 | MSEDLAKC  | 76.89 | IDP         | 0.8486 | Yes | 0.1218 | No  |   |   | 3  | Driver | 3  | -28.6 | No  | No | -0.92 | 0.004  |
| SNRPGP15 | A8MWD9 | >sp A8MWD9 | MSKAHPPB  | 34.21 | IDP         | 0.1100 | No  | 0.0127 | No  |   | + | 0  | No     | 4  | -5.5  | No  | No | -0.22 | 0.039  |
| SNRPG    | P62308 | >sp P62308 | MSKAHPPB  | 32.89 | IDP         | 0.1086 | No  | 0.0068 | No  |   | + | 0  | No     | 3  | -1.1  | No  | No | -0.07 | 0.039  |
| RBM8A    | Q9Y5S9 | >sp Q9Y5S9 | MADVLDLH  | 61.49 | IDP         | 0.9709 | Yes | 0.0354 | No  |   |   | 3  | Driver | 3  | -38.0 | No  | No | -1.15 | -0.020 |
| GSTM3    | P21266 | >sp P21266 | MSCCESSMV | 14.22 | Partial IDP | 0.1175 | No  | 0.0047 | No  |   | + | 0  | No     | 9  | -2.8  | No  | No | -0.41 | -0.016 |
| RPS17    | P08708 | >sp P08708 | MGRVRTKT  | 31.85 | IDP         | 0.1601 | No  | 0.009  | No  |   | + | 1  | Client | 5  | -11.4 | No  | No | -0.58 | 0.074  |
| RPS17L   | P0CW22 | >sp P08708 | MGRVRTKT  | 31.85 | IDP         | 0.1601 | No  | 0.009  | No  |   | + | 1  | Client | 5  | -11.4 | No  | No | -0.58 | 0.074  |
| HNRNPUL  | Q9BUJ2 | >sp Q9BUJ2 | MDVRRKLV  | 63.79 | IDP         | 0.9979 | Yes | 0.9796 | Yes | + |   | 4  | Driver | 14 | -29.5 | No  | No | -1.08 | 0.003  |
| RPS25    | P62851 | >sp P62851 | MPPKDDKV  | 46.4  | IDP         | 0.8546 | Yes | 0.0689 | No  |   |   | 2  | Driver | 5  | -26.9 | No  | No | -0.86 | 0.156  |
| C1QBP    | Q07021 | >sp Q07021 | MLPLLRCV  | 62.41 | IDP         | 0.3114 | No  | 0.332  | No  |   | + | 1  | Client | 12 | -14.6 | No  | No | -0.46 | -0.055 |
| EWSR1    | Q01844 | >sp Q01844 | MASTDYST  | 93.75 | IDP         | 0.9999 | Yes | 0.9991 | Yes | + |   | 5  | Driver | 2  | -34.4 | No  | No | -1.12 | 0.027  |
| SNRPD2   | P62316 | >sp P62316 | MSLLNPKK  | 54.24 | IDP         | 0.5876 | No  | 0.177  | No  |   | + | 2  | Client | 4  | -15.7 | No  | No | -0.71 | 0.097  |
| IGLC1    | P0CG04 | >sp P0CG04 | GQPKANPT  | 71.7  | IDP         | 0.2484 | No  | 0.0161 | No  |   | + | 0  | No     | 4  | -12.1 | No  | No | -0.52 | 0.019  |
| IGLC2    | P0CG05 | >sp P0CG05 | GQPKAAPS  | 74.53 | IDP         | 0.3838 | No  | 0.0419 | No  |   | + | 1  | Client | 4  | -9.8  | No  | No | -0.44 | 0.009  |
| IGLC3    | P0CG06 | >sp P0CG06 | GQPKAAPS  | 76.42 | IDP         | 0.5929 | No  | 0.0774 | No  |   | + | 1  | Client | 4  | -11.0 | No  | No | -0.46 | 0.009  |
| IGLC6    | P0CF74 | >sp P0CF74 | GQPKAAPS  | 73.58 | IDP         | 0.2728 | No  | 0.0324 | No  |   | + | 0  | No     | 4  | -11.1 | No  | No | -0.47 | 0.009  |
| IGLC7    | A0M8Q6 | >sp A0M8Q6 | GQPKAAPS  | 74.53 | IDP         | 0.3412 | No  | 0.0185 | No  |   | + | 0  | No     | 5  | -11.6 | No  | No | -0.46 | 0.028  |
| IGLL5    | B9A064 | >sp B9A064 | MRPKTGQY  | 69.16 | IDP         | 0.7742 | Yes | 0.1969 | No  |   |   | 2  | Driver | 7  | -7.7  | No  | No | -0.40 | 0.035  |
| POLA1    | P09884 | >sp P09884 | MAPVHGD   | 37.69 | IDP         | 0.6683 | Yes | 0.1415 | No  |   |   | 7  | Driver | 42 | -8.7  | No  | No | -0.46 | -0.011 |
| RBBP4    | Q09028 | >sp Q09028 | MADKEAAH  | 27.29 | Partial IDP | 0.3177 | No  | 0.1343 | No  |   | + | 3  | Client | 16 | -15.6 | No  | No | -0.56 | -0.064 |
| IGKC     | P01834 | >sp P01834 | RTVAAPSV  | 61.68 | IDP         | 0.2708 | No  | 0.0898 | No  |   | + | 1  | Client | 4  | -12.4 | No  | No | -0.54 | 0.000  |
| ZFR      | Q96KR1 | >sp Q96KR1 | MIPICPVVS | 74.49 | IDP         | 0.9935 | Yes | 0.9789 | Yes | + |   | 11 | Driver | 24 | -16.2 | No  | No | -0.56 | 0.037  |
| HSPA8    | P11142 | >sp P11142 | MSKGPVAV  | 38.7  | IDP         | 0.3211 | No  | 0.5824 | Yes |   |   | 2  | Client | 17 | -13.8 | No  | No | -0.46 | -0.015 |
| SRSF1    | Q07955 | >sp Q07955 | MSGGGVIF  | 63.71 | IDP         | 0.9496 | Yes | 0.9711 | Yes | + |   | 3  | Driver | 5  | -31.8 | No  | No | -1.15 | 0.087  |
| RPLP1    | P05386 | >sp P05386 | MASVSELA  | 50    | IDP         | 0.9423 | Yes | 0.1345 | No  |   |   | 1  | Driver | 5  | -8.0  | No  | No | 0.11  | -0.092 |
| DUSP3    | P51452 | >sp P51452 | MSGSFELSY | 17.84 | Partial IDP | 0.1135 | No  | 0.0024 | No  |   | + | 1  | Client | 6  | -7.8  | No  | No | -0.31 | 0.014  |
| EEF1D    | P29692 | >sp P29692 | MATNFLAH  | 62.99 | IDP         | 0.9193 | Yes | 0.4908 | No  |   |   | 3  | Driver | 6  | -22.9 | No  | No | -0.59 | -0.044 |
| RPL31    | P62899 | >sp P62899 | MAPAKKG   | 30.4  | IDP         | 0.2933 | No  | 0.0207 | No  |   | + | 1  | Client | 2  | -16.7 | No  | No | -0.81 | 0.144  |
| HMX3     | A6NHT5 | >sp A6NHT5 | MPEPGPDA  | 69.75 | IDP         | 0.9069 | Yes | 0.6825 | Yes | + |   | 2  | Driver | 8  | -18.8 | No  | No | -0.49 | 0.017  |
| RPL11    | P62913 | >sp P62913 | MAQQQGE   | 16.29 | Partial IDP | 0.1553 | No  | 0.0102 | No  |   | + | 1  | Client | 5  | -11.4 | No  | No | -0.53 | 0.070  |
| SF3A1    | Q15459 | >sp Q15459 | MPAGPVQ   | 77.68 | IDP         | 0.9627 | Yes | 0.9809 | Yes | + |   | 6  | Driver | 14 | -18.8 | No  | No | -0.74 | -0.026 |
| SNRNP40  | Q96DI7 | >sp Q96DI7 | MIEQQKRK  | 24.65 | Partial IDP | 0.2387 | No  | 0.1868 | No  |   | + | 2  | Client | 9  | -8.1  | No  | No | -0.35 | 0.022  |
| ESRP2    | Q9H6T0 | >sp Q9H6T0 | MTPPPPPP  | 32.6  | IDP         | 0.3368 | No  | 0.849  | Yes |   |   | 2  | Client | 25 | -0.9  | No  | No | -0.09 | 0.002  |
| RPS3     | P23396 | >sp P23396 | MAVQISKK  | 25.1  | Partial IDP | 0.2066 | No  | 0.0055 | No  |   | + | 1  | Client | 8  | -0.1  | No  | No | -0.15 | 0.056  |
| TRIM33   | Q9UPN9 | >sp Q9UPN9 | MAENKGG   | 65.04 | IDP         | 0.9995 | Yes | 0.8915 | Yes | + |   | 9  | Driver | 21 | -18.3 | No  | No | -0.54 | 0.003  |
| FIP1L1   | Q6UN15 | >sp Q6UN15 | MSAGEVER  | 77.1  | IDP         | 0.9978 | Yes | 0.9323 | Yes | + |   | 4  | Driver | 6  | -39.4 | No  | No | -1.25 | -0.021 |
| SRRPB    | Q9Y5M8 | >sp Q9Y5M8 | MASADSRF  | 29.52 | Partial IDP | 0.3636 | No  | 0.0331 | No  |   | + | 2  | Client | 9  | -0.1  | No  | No | -0.02 | 0.024  |
| CTDP1    | Q9Y5B0 | >sp Q9Y5B0 | MEVPAAG   | 67.12 | IDP         | 0.9981 | Yes | 0.972  | Yes | + |   | 5  | Driver | 16 | -28.0 | No  | No | -0.74 | -0.030 |
| THOC6    | Q86W42 | >sp Q86W42 | MERAVPLA  | 17.3  | Partial IDP | 0.1452 | No  | 0.0652 | No  |   | + | 0  | No     | 12 | -1.6  | No  | No | -0.16 | 0.015  |
| DEK      | P35659 | >sp P35659 | MSASAPAA  | 80.53 | IDP         | 0.9889 | Yes | 0.9115 | Yes | + |   | 2  | Driver | 4  | -39.4 | No  | No | -1.29 | 0.020  |
| COL5A1   | P20908 | >sp P20908 | MDVHTRW   | 79.71 | IDP         | 0.9984 | Yes | 0.7971 | Yes | + |   | 3  | Driver | 18 | -32.9 | No  | No | -0.87 | -0.026 |
| HAT1     | O14929 | >sp O14929 | MAGFGAM   | 18.38 | Partial IDP | 0.1434 | No  | 0.0051 | No  |   | + | 0  | No     | 11 | -1.7  | No  | No | -0.45 | -0.014 |
| PPM1G    | O15355 | >sp O15355 | MGAYLSQR  | 59.16 | IDP         | 0.9759 | Yes | 0.3021 | No  |   |   | 4  | Driver | 9  | -33.1 | No  | No | -0.81 | -0.130 |
| SRSF5    | Q13243 | >sp Q13243 | MSGCRVFI  | 69.49 | IDP         | 0.9488 | Yes | 0.648  | Yes | + |   | 2  | Driver | 3  | -38.3 | No  | No | -1.31 | 0.153  |
| YWHAB    | P31946 | >sp P31946 | MTMDKSE   | 54.47 | IDP         | 0.2884 | No  | 0.0169 | No  |   | + | 1  | Client | 7  | -20.8 | No  | No | -0.73 | -0.053 |
| CANX     | P27824 | >sp P27824 | MEGKWLL   | 54.39 | IDP         | 0.7564 | Yes | 0.2416 | No  |   |   | 3  | Driver | 14 | -25.6 | No  | No | -0.87 | -0.097 |
| YBX3     | P16989 | >sp P16989 | MSEAGEAT  | 86.29 | IDP         | 0.9974 | Yes | 0.9768 | Yes | + |   | 3  | Driver | 2  | -38.1 | No  | No | -1.11 | 0.039  |
| OTUB1    | Q96FW1 | >sp Q96FW1 | MAAEEPQQ  | 25.83 | Partial IDP | 0.1198 | No  | 0.0581 | No  |   | + | 2  | Client | 8  | -11.6 | No  | No | -0.55 | -0.052 |
| EEF1A1   | P68104 | >sp P68104 | MGKEKTHI  | 30.95 | IDP         | 0.2234 | No  | 0.0677 | No  |   | + | 3  | Client | 19 | -4.3  | No  | No | -0.26 | 0.035  |
| EEF1A1P5 | Q5VTE0 | >sp Q5VTE0 | MGKEKTHI  | 32.25 | IDP         | 0.2230 | No  | 0.1452 | No  |   | + | 3  | Client | 19 | -4.0  | No  | No | -0.25 | 0.037  |
| HNRNPL   | P14866 | >sp P14866 | MSRLLPR   | 51.95 | IDP         | 0.9229 | Yes | 0.9718 | Yes | + |   | 3  | Driver | 16 | -17.3 | No  | No | -0.65 | 0.024  |
| CALR     | P27797 | >sp P27797 | MLLSVPLL  | 52.04 | IDP         | 0.8045 | Yes | 0.2613 | No  |   |   | 2  | Driver | 10 | -33.7 | No  | No | -1.10 | -0.133 |
| RCOR1    | Q9UKL0 | >sp Q9UKL0 | MPAMVEK   | 58.97 | IDP         | 0.9797 | Yes | 0.9427 | Yes | + |   | 3  | Driver | 6  | -26.4 | No  | No | -0.76 | 0.005  |
| RPL4     | P36578 | >sp P36578 | MACARPLI  | 50.35 | IDP         | 0.3958 | No  | 0.0503 | No  |   | + | 4  | Client | 11 | -14.3 | No  | No | -0.61 | 0.177  |
| NIFK     | Q9BYG3 | >sp Q9BYG3 | MATFSGPA  | 69.62 | IDP         | 0.5870 | No  | 0.8185 | Yes |   |   | 4  | Client | 5  | -21.1 | No  | No | -0.95 | 0.082  |
| MDH2     | P40926 | >sp P40926 | MLSALARP  | 22.78 | Partial IDP | 0.2995 | No  | 0.0113 | No  |   | + | 0  | No     | 14 | 3.9   | Yes | No | 0.14  | 0.028  |
| RPL23A   | P62750 | >sp P62750 | MAPKAKKE  | 48.72 | IDP         | 0.6353 | Yes | 0.0151 | No  |   |   | 2  | Driver | 5  | -18.5 | No  | No | -0.73 | 0.186  |
| SUGP2    | Q8IX01 | >sp Q8IX01 | MAARRITQ  | 62.75 | IDP         | 0.9879 | Yes | 0.6401 | Yes | + |   | 11 | Driver | 18 | -19.1 | No  | No | -0.64 | 0.008  |
| POLD3    | Q15054 | >sp Q15054 | MADQLYLE  | 74.89 | IDP         | 0.9966 | Yes | 0.9953 | Yes | + |   | 4  | Driver | 7  | -24.2 | No  | No | -0.85 | 0.048  |
| CSTF2    | P33240 | >sp P33240 | MAGLTVRG  | 81.11 | IDP         | 0.9942 | Yes | 0.9489 | Yes | + |   | 1  | Driver | 10 | -20.2 | No  | No | -0.50 | 0.003  |
| INO80E   | Q8NBZ0 | >sp Q8NBZ0 | MNGPADG   | 93.85 | IDP         | 0.9953 | Yes | 0.4419 | No  |   |   | 2  | Driver | 8  | -20.6 | No  | No | -0.71 | 0.010  |
| RRP12    | Q5JTH9 | >sp Q5JTH9 | MGRSGKLF  | 36.24 | IDP         | 0.5879 | No  | 0.5229 | Yes |   |   | 7  | Client | 44 | -4.9  | No  | No | -0.23 | 0.032  |
| G3BP1    | Q13283 | >sp Q13283 | MVMEKPS   | 63.95 | IDP         | 0.9937 | Yes | 0.4903 | No  |   |   | 2  | Driver | 10 | -24.7 | No  | No | -0.83 | -0.021 |
| ARID1A   | Q14497 | >sp Q14497 | MAAQVAP   | 80.18 | IDP         | 1.0000 | Yes | 0.9758 | Yes | + |   | 8  | Driver | 28 | -24.6 | No  | No | -0.78 | 0.002  |
| KPNA4    | O00629 | >sp O00629 | MADNEKL   | 28.21 | Partial IDP | 0.1335 | No  | 0.4221 | No  |   | + | 0  | No     | 22 | -5.0  | No  | No | -0.16 | -0.042 |
| HSPA12B  | Q96MM6 | >sp Q96MM6 | MLAVPEM   | 24.05 | Partial IDP | 0.2691 | No  | 0.2726 | No  |   | + | 2  | Client | 23 | -4.5  | No  | No | -0.22 | 0.024  |
| RPL12    | P30050 | >sp P30050 | MPPKFDPN  | 23.64 | Partial IDP | 0.1717 | No  | 0.0066 | No  |   | + | 0  | No     | 5  | -12.6 | No  | No | -0.35 | 0.055  |
| HNRNPR   | O43390 | >sp O43390 | MANQVNG   | 58.77 | IDP         | 0.7561 | Yes | 0.9003 | Yes | + |   | 4  | Driver | 12 | -24.4 | No  | No | -0.93 | 0.012  |
| RPL18A   | Q02543 | >sp Q02543 | MKASGTLR  | 38.64 | IDP         | 0.1807 | No  | 0.0071 | No  |   | + | 1  | Client | 7  | -7.4  | No  | No | -     |        |



**Table S3.** Characteristics of the proteome of the nSBs. DPR are droplet-promoting regions, nHS are number of aggregation hot spots, Na4vSS are Normalized a4v Sequence Sum for 100 residues used for aggregation prediction.

| Gene Name | UniProtID | Fasta    | Sequence  | PER(VSL2B) | Disorder Classification | FuzDrop Score | FuzDrop LLPS | PSPredictor Score | PSPredictor LLPS | Fuz&PSP LLPS | Fuz&PSP No LLPS | Number of DPRs | Role in MLO | nHS | Na4vSS   | Agregation Predicted | Aggregati on DB | Hydroph obicity | Charge |
|-----------|-----------|----------|-----------|------------|-------------------------|---------------|--------------|-------------------|------------------|--------------|-----------------|----------------|-------------|-----|----------|----------------------|-----------------|-----------------|--------|
| HSF1      | Q00613    | >sp Q006 | MDLPVGGP  | 72.97      | IDP                     | 0.9884        | Yes          | 0.9457            | Yes              | +            |                 | 5              | Driver      | 15  | -0.112   | No                   | No              | -0.39           | -0.029 |
| HSF2      | Q03933    | >sp Q039 | MKQSSNVPA | 67.35      | IDP                     | 0.8074        | Yes          | 0.8322            | Yes              | +            |                 | 5              | Driver      | 11  | -0.16    | No                   | No              | -0.58           | -0.054 |
| SLTM      | Q9NWH9    | >sp Q9NV | MAAATGAV  | 92.65      | IDP                     | 0.9998        | Yes          | 0.9665            | Yes              | +            |                 | 6              | Driver      | 6   | -50      | No                   | No              | -1.45           | 0.015  |
| NCOA5     | Q9HCD5    | >sp Q9HC | MNTAPSRPS | 81.52      | IDP                     | 0.9973        | Yes          | 0.7903            | Yes              | +            |                 | 5              | Driver      | 8   | -35.4    | No                   | No              | -1.10           | 0.032  |
| DHX9      | Q08211    | >sp Q082 | MGDVKNFL  | 32.28      | IDP                     | 0.7863        | Yes          | 0.1976            | No               |              |                 | 5              | Driver      | 39  | -5.4     | No                   | No              | -0.34           | 0.004  |
| ZNF638    | Q14966    | >sp Q149 | MSRPRFNPF | 81.24      | IDP                     | 0.9954        | Yes          | 0.9458            | Yes              | +            |                 | 20             | Driver      | 34  | -24.3    | No                   | No              | -0.81           | -0.003 |
| HNRNPM    | P52272    | >sp P522 | MAAGVEAA  | 76.30      | IDP                     | 0.9997        | Yes          | 0.8675            | Yes              | +            |                 | 8              | Driver      | 18  | -14      | No                   | No              | -0.34           | 0.015  |
| SRSF1     | Q07955    | >sp Q079 | MSGGGVIRG | 63.71      | IDP                     | 0.9496        | Yes          | 0.9711            | Yes              | +            |                 | 3              | Driver      | 5   | -31.8    | No                   | No              | -1.15           | 0.087  |
| TRA2B     | P62995    | >sp P629 | MSDSGEQN  | 79.17      | IDP                     | 0.9948        | Yes          | 0.9957            | Yes              | +            |                 | 3              | Driver      | 4   | -42.9    | No                   | No              | -1.62           | 0.158  |
| SAFB2     | Q14151    | >sp Q141 | MAETLPGSG | 93.18      | IDP                     | 0.9996        | Yes          | 0.7464            | Yes              | +            |                 | 7              | Driver      | 6   | -45.5    | No                   | No              | -1.29           | -0.009 |
| RBMX      | P38159    | >sp P381 | MVEADRP   | 86.96      | IDP                     | 0.9984        | Yes          | 0.9984            | Yes              | +            |                 | 1              | Driver      | 3   | -40.5    | No                   | No              | -1.37           | 0.063  |
| RBMXL1    | Q96E39    | >sp Q96E | MVEADRP   | 86.92      | IDP                     | 0.9984        | Yes          | 0.998             | Yes              | +            |                 | 2              | Driver      | 3   | -38.2    | No                   | No              | -1.29           | 0.056  |
| SRSF9     | Q13242    | >sp Q132 | MSGWADEF  | 52.04      | IDP                     | 0.8195        | Yes          | 0.0665            | No               |              |                 | 3              | Driver      | 4   | -25.3    | No                   | No              | -1.07           | 0.023  |
| DDX39A    | O00148    | >sp O001 | MAEQDVEN  | 18.27      | Partial IDP             | 0.1354        | No           | 0.0079            | No               |              | +               | 1              | Client      | 16  | -4       | No                   | No              | -0.30           | -0.016 |
| DDX39B    | Q13838    | >sp Q138 | MAENDVDN  | 20.79      | Partial IDP             | 0.115         | No           | 0.0115            | No               |              | +               | 2              | Client      | 14  | -4.4     | No                   | No              | -0.27           | -0.018 |
| SRSF7     | Q16629    | >sp Q166 | MSRYGRYG  | 81.09      | IDP                     | 0.9857        | Yes          | 0.9955            | Yes              | +            |                 | 2              | Driver      | 5   | -36.7    | No                   | No              | -1.40           | 0.200  |
| THRAP3    | Q9Y2W1    | >sp Q9Y2 | MSKTNKSKS | 97.91      | IDP                     | 0.9996        | Yes          | 0.998             | Yes              | +            |                 | 2              | Driver      | 4   | -48.8    | No                   | No              | -1.63           | 0.097  |
| POLDIP3   | Q9BY77    | >sp Q9BY | MADISLDEL | 76.48      | IDP                     | 0.3363        | No           | 0.8247            | Yes              |              |                 | 2              | Client      | 10  | -15.1    | No                   | No              | -0.47           | 0.071  |
| RBM15     | Q96T37    | >sp Q96T | MRTAGRDP  | 68.78      | IDP                     | 0.9996        | Yes          | 0.891             | Yes              | +            |                 | 6              | Driver      | 14  | -27.8    | No                   | No              | -0.87           | 0.058  |
| BCLAF1    | Q9NYF8    | >sp Q9NY | MGRSNSRSR | 96.96      | IDP                     | 0.9995        | Yes          | 0.9979            | Yes              | +            |                 | 11             | Driver      | 4   | -47.3    | No                   | No              | -1.63           | 0.088  |
| SRSF2     | Q01130    | >sp Q011 | MSYGRPPPT | 83.71      | IDP                     | 0.9964        | Yes          | 0.9881            | Yes              | +            |                 | 1              | Driver      | 2   | -45.8    | No                   | No              | -1.62           | 0.206  |
| ALYREF    | Q86V81    | >sp Q86V | MADKMDM   | 66.54      | IDP                     | 0.996         | Yes          | 0.986             | Yes              | +            |                 | 2              | Driver      | 3   | -35      | No                   | No              | -0.82           | 0.080  |
| HNRNPA2   | P22626    | >sp P226 | MEKTLETVP | 69.97      | IDP                     | 0.9808        | Yes          | 0.9977            | Yes              | +            |                 | 2              | Driver      | 4   | -26.5    | No                   | No              | -0.93           | 0.024  |
| SRSF3     | P84103    | >sp P841 | MHRDSCPLD | 74.39      | IDP                     | 0.9945        | Yes          | 0.8645            | Yes              | +            |                 | 1              | Driver      | 4   | -43.2    | No                   | No              | -1.52           | 0.165  |
| RBMXL2    | O75526    | >sp O755 | MVEADRP   | 86.73      | IDP                     | 0.9981        | Yes          | 0.9385            | Yes              | +            |                 | 1              | Driver      | 3   | -38.5    | No                   | No              | -1.25           | 0.080  |
| RBMXL3    | Q8N7X1    | >sp Q8N7 | MMEADRP   | 93.35      | IDP                     | 0.9997        | Yes          | 0.996             | Yes              | +            |                 | 3              | Driver      | 7   | -42.1    | No                   | No              | -1.37           | 0.047  |
| LUC7L3    | O95232    | >sp O952 | MISAAQLLD | 77.31      | IDP                     | 0.9957        | Yes          | 0.6483            | Yes              | +            |                 | 2              | Driver      | 4   | -55.1    | No                   | No              | -1.70           | 0.074  |
| YTHDC1    | Q96MU7    | >sp Q96M | MAADSREEH | 81.71      | IDP                     | 0.9987        | Yes          | 0.9083            | Yes              | +            |                 | 3              | Driver      | 8   | -47.8    | No                   | No              | -1.52           | -0.008 |
| SRSF5     | Q13243    | >sp Q132 | MSGCRVFIG | 69.49      | IDP                     | 0.9488        | Yes          | 0.648             | Yes              | +            |                 | 2              | Driver      | 3   | -38.3    | No                   | No              | -1.31           | 0.153  |
| RBM12B    | Q8IXT5    | >sp Q8IX | MAVVIRLLG | 64.84      | IDP                     | 0.9936        | Yes          | 0.7464            | Yes              | +            |                 | 6              | Driver      | 23  | -28.8    | No                   | No              | -1.08           | 0.006  |
| DDX5      | P17844    | >sp P178 | MSGYSSDRD | 41.04      | IDP                     | 0.5261        | No           | 0.4192            | No               |              | +               | 3              | Client      | 18  | -16      | No                   | No              | -0.64           | 0.029  |
| C7orf55-L | Q96HJ9    | >sp Q96H | MAALGSPSH | 35.40      | IDP                     | 0.6512        | Yes          | 0.0023            | No               |              |                 | 1              | Driver      | 3   | -10.8    | No                   | No              | -0.47           | 0.115  |
| SRSF4     | Q08170    | >sp Q081 | MPRVYIGRL | 77.33      | IDP                     | 0.9972        | Yes          | 0.9944            | Yes              | +            |                 | 2              | Driver      | 5   | -55.3    | No                   | No              | -1.84           | 0.197  |
| SRSF6     | Q13247    | >sp Q132 | MPRVYIGRL | 70.35      | IDP                     | 0.9978        | Yes          | 0.998             | Yes              | +            |                 | 2              | Driver      | 4   | -43.4    | No                   | No              | -1.55           | 0.170  |
| PPHLN1    | Q8NEY8    | >sp Q8NE | MWSEGRYE  | 85.59      | IDP                     | 0.9978        | Yes          | 0.91              | Yes              | +            |                 | 4              | Driver      | 4   | -36.1    | No                   | No              | -1.30           | 0.032  |
| CPSF7     | Q8N684    | >sp Q8N6 | MSEGVDLID | 74.95      | IDP                     | 0.9987        | Yes          | 0.9906            | Yes              | +            |                 | 5              | Driver      | 12  | -22.6    | No                   | No              | -0.78           | 0.020  |
| SPEN      | Q96T58    | >sp Q96T | MVRETRHLV | 84.12      | IDP                     | 1             | Yes          | 0.8979            | Yes              | +            |                 | 24             | Driver      | 55  | -27.3501 | No                   | No              | -0.86           | 0.011  |
| ZC3H13    | Q5T200    | >sp Q5T2 | MSKIRRKVT | 94.18      | IDP                     | 0.9997        | Yes          | 0.8977            | Yes              | +            |                 | 5              | Driver      | 10  | -61.8    | No                   | No              | -1.86           | 0.041  |
| SRSF10    | O75494    | >sp O754 | MSRYLRPPN | 73.28      | IDP                     | 0.9947        | Yes          | 0.979             | Yes              | +            |                 | 1              | Driver      | 4   | -45.3    | No                   | No              | -1.76           | 0.179  |
| PPIA      | P62937    | >sp P629 | MVNPTVFFD | 20.61      | Partial IDP             | 0.2089        | No           | 0.0057            | No               |              | +               | 0              | No          | 7   | -6.7     | No                   | No              | -0.32           | 0.018  |
| U2AF2     | P26368    | >sp P263 | MSDFDEFER | 42.74      | IDP                     | 0.3891        | No           | 0.0708            | No               |              | +               | 2              | Client      | 14  | -15      | No                   | No              | -0.59           | 0.031  |
| DDX17     | Q92841    | >sp Q928 | MPTGFVAPI | 46.36      | IDP                     | 0.8739        | Yes          | 0.856             | Yes              | +            |                 | 3              | Driver      | 21  | -16.8    | No                   | No              | -0.61           | 0.016  |
| HNRNPA1   | P09651    | >sp P096 | MSKSESPKE | 70.16      | IDP                     | 0.9998        | Yes          | 0.9977            | Yes              | +            |                 | 1              | Driver      | 7   | -27.8    | No                   | No              | -0.89           | 0.030  |
| HNRNPA1   | Q32P51    | >sp Q32P | MSKSASPKE | 63.13      | IDP                     | 0.9711        | Yes          | 0.9958            | Yes              | +            |                 | 1              | Driver      | 7   | -25.6    | No                   | No              | -0.84           | 0.031  |
| HNRNPK    | P61978    | >sp P619 | METEQEET  | 56.80      | IDP                     | 0.9031        | Yes          | 0.2392            | No               |              |                 | 4              | Driver      | 9   | -19.7    | No                   | No              | -0.70           | -0.013 |
| SRSF12    | Q8WXF0    | >sp Q8WJ | MSRYTRPPN | 73.18      | IDP                     | 0.9941        | Yes          | 0.9897            | Yes              | +            |                 | 1              | Driver      | 3   | -40.1    | No                   | No              | -1.53           | 0.193  |
| LUC7L     | Q9NQ29    | >sp Q9NQ | MSAQQAM   | 74.66      | IDP                     | 0.944         | Yes          | 0.0191            | No               |              |                 | 2              | Driver      | 3   | -45.7    | No                   | No              | -1.34           | 0.075  |
| LUC7L2    | Q9Y383    | >sp Q9Y3 | MSAQQAM   | 74.79      | IDP                     | 0.9512        | Yes          | 0.0666            | No               |              |                 | 2              | Driver      | 2   | -50.2    | No                   | No              | -0.49           | 0.017  |
| FYTTD1    | Q96QD9    | >sp Q96Q | KVHDLALRA | 71.38      | IDP                     | 0.6429        | Yes          | 0.4269            | No               |              |                 | 3              | Driver      | 5   | -21.8    | No                   | No              | -0.52           | -0.100 |
| TRA2A     | Q13595    | >sp Q135 | AKAERVHEL | 80.50      | IDP                     | 0.9968        | Yes          | 0.9839            | Yes              | +            |                 | 2              | Driver      | 4   | -41.3    | No                   | No              | -0.97           | -0.042 |
| DNAJC14   | Q6Y2X3    | >sp Q6Y2 | SFQQQKLRV | 55.41      | IDP                     | 0.9019        | Yes          | 0.5774            | Yes              | +            |                 | 4              | Driver      | 11  | -18.4    | No                   | No              | -0.76           | 0.058  |
| SARNP     | P82979    | >sp P829 | QERLKRREE | 99.05      | IDP                     | 0.9812        | Yes          | 0.3577            | No               |              |                 | 4              | Driver      | 4   | -32.2    | No                   | No              | -3.05           | 0.358  |
| HNRNPA3   | P51991    | >sp P519 | HRHRSRSSS | 70.11      | IDP                     | 0.9994        | Yes          | 0.9966            | Yes              | +            |                 | 2              | Driver      | 6   | -30.9    | No                   | No              | -2.59           | 0.283  |
| HNRNPF    | P52597    | >sp P525 | DRDRKDKKF | 40.48      | IDP                     | 0.5243        | No           | 0.0968            | No               |              | +               | 3              | Client      | 10  | -10.7    | No                   | No              | -2.49           | 0.000  |
| SRRM1     | Q8IYB3    | >sp Q8IY | MDAGFFRG  | 90.27      | IDP                     | 0.9985        | Yes          | 0.9964            | Yes              | +            |                 | 2              | Driver      | 7   | -48.3    | No                   | No              | -1.66           | 0.192  |
| CHTOP     | Q9Y3Y2    | >sp Q9Y3 | MAAQSAKP  | 100.00     | IDP                     | 0.927         | Yes          | 0.9882            | Yes              | +            |                 | 3              | Driver      | 2   | -27.8    | No                   | No              | -0.71           | 0.159  |
| SRSF8     | Q9BRL6    | >sp Q9BR | MSCGRPPPI | 84.75      | IDP                     | 0.9973        | Yes          | 0.9973            | Yes              | +            |                 | 1              | Driver      | 3   | -41.7    | No                   | No              | -1.58           | 0.199  |
| CPSF6     | Q16630    | >sp Q166 | MADGVDHI  | 79.31      | IDP                     | 0.9976        | Yes          | 0.9637            | Yes              | +            |                 | 4              | Driver      | 5   | -30.4    | No                   | No              | -0.97           | 0.007  |
| NUDT21    | O43809    | >sp O438 | MSVVPPNR  | 19.82      | Partial IDP             | 0.134         | No           | 0.0115            | No               |              | +               | 1              | Client      | 12  | -0.5     | No                   | No              | -0.40           | 0.024  |
| SFPQ      | P23246    | >sp P232 | MSDRDRFSR | 79.77      | IDP                     | 0.999         | Yes          | 0.9964            | Yes              | +            |                 | 3              | Driver      | 7   | -36.4    | No                   | No              | -1.13           | 0.031  |
| RBM39     | Q14498    | >sp Q144 | MADDIDIEA | 51.89      | IDP                     | 0.4127        | No           | 0.5286            | Yes              |              |                 | 1              | Client      | 17  | -18.5    | No                   | No              | -0.65           | 0.069  |
| E1FA43    | P38919    | >sp P389 | MATTATMA  | 18.73      | Partial IDP             | 0.1758        | No           | 0.017             | No               |              | +               | 1              | Client      | 15  | -2.9     | No                   | No              | -0.26           | 0.001  |
| HNRNPH1   | P31943    | >sp P319 | MMLGTEGG  | 51.22      | IDP                     | 0.9486        | Yes          | 0.9727            | Yes              | +            |                 | 3              | Driver      | 9   | -16      | No                   | No              | -0.60           | -0.004 |
| HNRNPH2   | P55795    | >sp P557 | MMLSTEGR  | 52.34      | IDP                     | 0.9768        | Yes          | 0.9661            | Yes              | +            |                 | 2              | Driver      | 8   | -15.4    | No                   | No              | -0.60           | -0.004 |
| NONO      | Q15233    | >sp Q152 | MQSNKFTN  | 76.86      | IDP                     | 0.9869        | Yes          | 0.609             | Yes              | +            |                 | 4              | Driver      | 8   | -30.6    | No                   | No              | -1.00           | 0.025  |
| CFL1      | P23528    | >sp P235 | MASGVAVS  | 36.75      | IDP                     | 0.2136        | No           | 0.0245            | No               |              | +               | 0              | No          | 9   | -6.9     | No                   | No              | -0.36           | 0.015  |
| DDX23     | Q9BUQ8    | >sp Q9BU | MAGELADK  | 54.27      | IDP                     | 0.7561        | Yes          | 0.1926            | No               |              |                 | 2              | Driver      | 17  | -35.4    | No                   | No              | -1.15           | 0.051  |
| TARDBP    | Q13148    | >sp Q131 | MSEYIRVTE | 57.25      | IDP                     | 0.8981        | Yes          | 0.9845            | Yes              | +            |                 | 1              | Driver      | 11  | -17.1    | No                   | Yes             | -0.53           | -0.004 |
| WTAP      | Q15007    | >sp Q150 | MTNEEPLPK | 86.11      | IDP                     | 0.9367        | Yes          | 0.9979            | Yes              | +            |                 | 2              | Driver      | 5   | -33.5    | No                   | No              | -1.00           | -0.025 |
| FUS       | P35637    | >sp P356 | MASNDYTG  | 90.68      | IDP                     | 0.9999        | Yes          | 0.9987            | Yes              | +            |                 | 3              | Driver      | 2   | -44.3    | No                   | Yes             | -1.32           | 0.029  |
| TAF15     | Q92804    | >sp Q928 | MSDSGSYG  | 92.57      | IDP                     | 1             | Yes          | 0.9952            | Yes              | +            |                 | 4              | Driver      | 3   | -50.1    | No                   | No              | -1.52           | 0.009  |
| ARGLU1    | Q9NWB6    | >sp Q9NV | MGRSRSRSS | 100.00     | IDP                     | 0.9913        | Yes          | 0.2733            | No               |              |                 | 5              | Driver      | 0   | -58.4    | No                   | No              | -1.83           | 0.097  |
| HNRNPU    | Q00839    | >sp Q008 | MSSSPVNVH | 61.94      | IDP                     | 0.9928        | Yes          | 0.9934            | Yes              | +            |                 | 3              | Driver      | 15  | -32.4    | No                   | No              | -0.98           | -0.008 |
| SAP18     | O00422    | >sp O004 | MAVESRVTC | 62.75      | IDP                     | 0.4504        | No           | 0.0159            | No               |              | +               | 2              | Client      | 5   | -17.4    | No                   | No              | -0.77           | 0.042  |
| API5      | Q9BZ25    | >sp Q9BZ | MPTVEELYR | 32.82      | IDP                     | 0.2881        | No           | 0.267             | No               |              | +               | 2              | Client      | 16  | -8.2     | No                   | No              | -0.39           | 0.005  |
| HNRNPAB   | Q99729    | >sp Q997 | MSEAGEEQ  | 81.33      | IDP                     | 0.9939        | Yes          | 0.991             | Yes              | +            |                 | 2              | Driver      | 8   | -28      | No                   | No              | -1.01           | 0.012  |



|          |        |          |           |       |             |        |     |        |     |   |   |    |        |    |       |     |    |       |        |
|----------|--------|----------|-----------|-------|-------------|--------|-----|--------|-----|---|---|----|--------|----|-------|-----|----|-------|--------|
| DDX21    | Q9NR30 | >sp Q9NR | MPGKLRSDA | 45.34 | IDP         | 0.4512 | No  | 0.9921 | Yes |   |   | 4  | Client | 22 | -21.8 | No  | No | -0.76 | 0.042  |
| DDX3X    | O00571 | >sp O005 | MSHVAVEN  | 40.94 | IDP         | 0.8355 | Yes | 0.998  | Yes | + |   | 2  | Driver | 18 | -17.3 | No  | No | -0.63 | 0.008  |
| DDX3Y    | O15523 | >sp O155 | MSHVVKKN  | 41.21 | IDP         | 0.8518 | Yes | 0.9453 | Yes | + |   | 3  | Driver | 18 | -17.2 | No  | No | -0.64 | 0.011  |
| FAM208A  | Q9UK61 | >sp Q9UK | MATAVETE  | 49.94 | IDP         | 0.9916 | Yes | 0.7529 | Yes | + |   | 16 | Driver | 44 | -15.1 | No  | No | -0.64 | -0.015 |
| HSPA8    | P11142 | >sp P111 | MSKGPAVG  | 38.70 | IDP         | 0.3211 | No  | 0.5824 | Yes |   |   | 2  | Client | 17 | -13.8 | No  | No | -0.46 | -0.015 |
| LMNA     | P02545 | >sp P025 | METPSQRR  | 87.65 | IDP         | 0.9517 | Yes | 0.9161 | Yes | + |   | 6  | Driver | 8  | -31.5 | No  | No | -0.86 | 0.005  |
| ZC3H11A  | O75152 | >sp O751 | MPNQGEDC  | 87.53 | IDP         | 0.9982 | Yes | 0.8823 | Yes | + |   | 10 | Driver | 16 | -23.5 | No  | No | -0.75 | 0.020  |
| PRPF38B  | Q5VTL8 | >sp Q5VT | MANNSPAL  | 69.60 | IDP         | 0.9991 | Yes | 0.9106 | Yes | + |   | 3  | Driver | 6  | -51.9 | No  | No | -1.70 | 0.127  |
| RBM23    | Q86U06 | >sp Q86U | MASDDFDIV | 65.83 | IDP         | 0.681  | Yes | 0.0835 | No  |   |   | 1  | Driver | 14 | -23.7 | No  | No | -0.72 | 0.051  |
| RBMX2    | Q9Y388 | >sp Q9Y3 | MNPLTKVKL | 67.70 | IDP         | 0.9958 | Yes | 0.9853 | Yes | + |   | 1  | Driver | 5  | -45.1 | No  | No | -1.53 | 0.096  |
| RPS27A   | P62979 | >sp P629 | MQIFVKTLT | 57.05 | IDP         | 0.1763 | No  | 0.0069 | No  |   | + | 1  | Client | 7  | -19.2 | No  | No | -0.84 | 0.115  |
| UBA52    | P62987 | >sp P629 | MQIFVKTLT | 39.84 | IDP         | 0.1393 | No  | 0.0758 | No  |   | + | 1  | Client | 4  | -17.5 | No  | No | -0.70 | 0.121  |
| UBB      | P0CG47 | >sp P0CG | MQIFVKTLT | 30.57 | IDP         | 0.1455 | No  | 0.0047 | No  |   | + | 0  | No     | 4  | -12.2 | No  | No | -0.48 | 0.007  |
| UBC      | P0CG48 | >sp P0CG | MQIFVKTLT | 28.76 | Partial IDP | 0.1563 | No  | 0.0106 | No  |   | + | 0  | No     | 10 | -12.3 | No  | No | -0.48 | 0.007  |
| SRP14    | P37108 | >sp P371 | MVLLESEQF | 74.26 | IDP         | 0.5059 | No  | 0.1114 | No  |   | + | 1  | Client | 5  | -16.8 | No  | No | -0.44 | 0.110  |
| SUB1     | P53999 | >sp P539 | MPKSKELVS | 86.61 | IDP         | 0.9209 | Yes | 0.8756 | Yes | + |   | 1  | Driver | 2  | -32.1 | No  | No | -1.09 | 0.055  |
| DDX1     | Q92499 | >sp Q924 | MAAFSEMG  | 16.08 | Partial IDP | 0.2648 | No  | 0.802  | Yes |   |   | 2  | Client | 23 | -8.8  | No  | No | -0.40 | 0.013  |
| FUBP1    | Q96AE4 | >sp Q96A | MADYSTVPP | 84.47 | IDP         | 0.9962 | Yes | 0.9922 | Yes | + |   | 11 | Driver | 10 | -24.9 | No  | No | -0.74 | 0.009  |
| HIST1H1C | P16403 | >sp P164 | MSETAPAAP | 97.65 | IDP         | 0.9966 | Yes | 0.9886 | Yes | + |   | 2  | Driver | 3  | -25.6 | No  | No | -0.68 | 0.258  |
| HNRNPA0  | Q13151 | >sp Q131 | MENSQLCKI | 61.97 | IDP         | 0.9818 | Yes | 0.9959 | Yes | + |   | 1  | Driver | 5  | -20.5 | No  | No | -0.59 | 0.043  |
| HSPA1A   | P31948 | >sp P319 | MEQVNELKI | 55.80 | IDP         | 0.4991 | No  | 0.0334 | No  |   | + | 5  | Client | 5  | -26.6 | No  | No | -0.94 | 0.003  |
| HSPA1B   | V9GZ37 | >tr V9GZ | MAKAAAI   | 37.18 | IDP         | 0.4139 | No  | 0.4516 | No  |   | + | 2  | Client | 13 | -14.6 | No  | No | -0.41 | -0.017 |
| HSPA1L   | P34931 | >sp P349 | MATAKGIAI | 28.39 | Partial IDP | 0.2245 | No  | 0.1552 | No  |   | + | 1  | Client | 21 | -10.1 | No  | No | -0.34 | -0.006 |
| HSPA2    | P54652 | >sp P546 | MSARGPAIC | 38.03 | IDP         | 0.3147 | No  | 0.4757 | No  |   | + | 1  | Client | 18 | -15.1 | No  | No | -0.49 | -0.010 |
| HSPA5    | P11021 | >sp P110 | MKLSLVAAN | 41.28 | IDP         | 0.4337 | No  | 0.3872 | No  |   | + | 3  | Client | 18 | -14.8 | No  | No | -0.49 | -0.029 |
| KIAA1429 | Q69YN4 | >sp Q69Y | MAVDSAME  | 41.78 | IDP         | 0.9241 | Yes | 0.7061 | Yes | + |   | 9  | Driver | 57 | -10.4 | No  | No | -0.40 | -0.041 |
| PPIAL4C  | A0A0B4 | >tr A0A0 | MTPVHFSFS | 10.20 | Partial IDP | 0.1476 | No  | 0.0681 | No  |   | + | 0  | No     | 4  | 30.8  | Yes | No | 0.89  | 0.010  |
| PPIG     | Q13427 | >sp Q134 | MGIKVQRPF | 83.95 | IDP         | 0.9974 | Yes | 0.9977 | Yes | + |   | 6  | Driver | 7  | -57.3 | No  | No | -1.88 | 0.135  |
| PRPF4B   | Q13523 | >sp Q135 | MAAAETQSI | 66.63 | IDP         | 0.9961 | Yes | 0.9923 | Yes | + |   | 3  | Driver | 15 | -37.8 | No  | No | -1.29 | 0.116  |
| PTBP1    | P26599 | >sp P265 | MDGIVPDIA | 43.27 | IDP         | 0.5386 | No  | 0.9415 | Yes |   |   | 4  | Client | 25 | -2.7  | No  | No | -0.12 | 0.030  |
| PTBP3    | O95758 | >sp O957 | MDGVVTDL  | 39.31 | IDP         | 0.8663 | Yes | 0.7874 | Yes | + |   | 5  | Driver | 22 | 0.1   | Yes | No | -0.10 | 0.030  |
| PURB     | Q96QR8 | >sp Q96Q | MADGDSGS  | 62.18 | IDP         | 0.9803 | Yes | 0.5841 | Yes | + |   | 5  | Driver | 6  | -24.6 | No  | No | -0.67 | -0.014 |
| RBM14    | Q96PK6 | >sp Q96P | MKIFVGND  | 81.32 | IDP         | 0.9999 | Yes | 0.9903 | Yes | + |   | 6  | Driver | 7  | -15.4 | No  | No | -0.45 | 0.043  |
| RBM15B   | Q8NDT2 | >sp Q8ND | MKRQSERD  | 61.24 | IDP         | 0.9935 | Yes | 0.7781 | Yes | + |   | 5  | Driver | 16 | -27.8 | No  | No | -0.85 | 0.058  |
| RNF20    | Q5VTR2 | >sp Q5VT | MSGIGNKRA | 77.85 | IDP         | 0.7779 | Yes | 0.5943 | Yes | + |   | 7  | Driver | 10 | -34.3 | No  | No | -1.04 | -0.011 |
| SNRNP27  | Q8WVK2 | >sp Q8WV | MGRSRSRSF | 83.87 | IDP         | 0.9856 | Yes | 0.8507 | Yes | + |   | 1  | Driver | 3  | -59.2 | No  | No | -2.00 | 0.194  |
| TOP1     | P11387 | >sp P113 | MSGDHLHN  | 60.52 | IDP         | 0.3929 | No  | 0.2234 | No  |   | + | 3  | Client | 10 | -34.5 | No  | No | -1.29 | 0.060  |
